# Supplementary material
Source: ML conference proceedings conference paper supplement (https://openreview.net/forum?id=3Lx8vMNJZ1)
Supplement: supplementary_material [file attachment]

---

# Borda Regret Minimization for Generalized Linear Dueling Bandits

---

Anonymous Author(s)

Affiliation

Address

email

## Abstract

1 Dueling bandits are widely used to model preferential feedback prevalent in many  
2 applications such as recommendation systems and ranking. In this paper, we study  
3 the Borda regret minimization problem for dueling bandits, which aims to identify  
4 the item with the highest Borda score while minimizing the cumulative regret. We  
5 propose a rich class of generalized linear dueling bandit models, which cover many  
6 existing models. We first prove a regret lower bound of order  $\Omega(d^{2/3}T^{2/3})$  for the  
7 Borda regret minimization problem, where  $d$  is the dimension of contextual vectors  
8 and  $T$  is the time horizon. To attain this lower bound, we propose an explore-  
9 then-commit type algorithm for the stochastic setting, which has a nearly matching  
10 regret upper bound  $\tilde{O}(d^{2/3}T^{2/3})$ . We also propose an EXP3-type algorithm for the  
11 adversarial setting, where the underlying model parameter can change at each round.  
12 Our algorithm achieves an  $\tilde{O}(d^{2/3}T^{2/3})$  regret, which is also optimal. Empirical  
13 evaluations on both synthetic data and a simulated real-world environment are  
14 conducted to corroborate our theoretical analysis.

## 15 1 Introduction

16 Multi-armed bandits (MAB) (Lattimore and Szepesvári, 2020) is an interactive game where at each  
17 round, an agent chooses an arm to pull and receives a noisy reward as feedback. In contrast to numer-  
18 ical feedback considered in classic MAB settings, preferential feedback is more natural in various  
19 online learning tasks including information retrieval Yue and Joachims (2009), recommendation  
20 systems Sui and Burdick (2014), ranking Minka et al. (2018), crowdsourcing Chen et al. (2013), etc.  
21 Moreover, numerical feedback is also more difficult to gauge and prone to errors in many real-world  
22 applications. For example, when provided with items to shop or movies to watch, it is more natural  
23 for a customer to pick a preferred one than scoring the options. This motivates *Dueling Bandits*  
24 (Yue and Joachims, 2009), where the agent repeatedly pulls two arms at a time and is provided with  
25 feedback being the binary outcome of “duels” between the two arms.

26 In dueling bandits problems, the outcome of duels is commonly modeled as Bernoulli random vari-  
27 ables due to their binary nature. At each round, suppose the agent chooses to compare arm  $i$  and  $j$ , then  
28 the binary feedback is assumed to be sampled independently from a Bernoulli distribution. For a duel-  
29 ing bandits instance with  $K$  arms, the probabilistic model of the instance can be fully characterized by  
30 a  $K \times K$  preference probability matrix with each entry being:  $p_{i,j} = \mathbb{P}(\text{arm } i \text{ is chosen over arm } j)$ .

31 In a broader range of applications such as ranking, “arms” are often referred to as “items”. We will  
32 use these two terms interchangeably in the rest of this paper. One central goal of dueling bandits  
33 is to devise a strategy to identify the “optimal” item as quickly as possible, measured by either  
34 sample complexity or cumulative regret. However, the notion of optimality for dueling bandits is way  
35 harder to define than for multi-armed bandits. The latter can simply define the arm with the highest  
36 numerical feedback as the optimal arm, while for dueling bandits there is no obvious definition solely  
37 dependent on  $\{p_{i,j} | i, j \in [K]\}$ .

The first few works on dueling bandits imposed strong assumptions on  $p_{i,j}$ . For example, Yue et al. (2012) assumed that there exists a true ranking that is coherent among all items, and the preference probabilities must satisfy both strong stochastic transitivity (SST) and stochastic triangle inequality (STI). While relaxations like weak stochastic transitivity (Falahatgar et al., 2018) or relaxed stochastic transitivity (Yue and Joachims, 2011) exist, they typically still assume the true ranking exists and the preference probabilities are consistent, i.e.,  $p_{i,j} > \frac{1}{2}$  if and only if  $i$  is ranked higher than  $j$ . In reality, the existence of such coherent ranking aligned with item preferences is rarely the case. For example,  $p_{i,j}$  may be interpreted as the probability of one basketball team  $i$  beating another team  $j$ , and there can be a circle among the match advantage relations.

In this paper, we do not assume such coherent ranking exists and solely rely on the *Borda score* based on preference probabilities. The Borda score  $B(i)$  of an item  $i$  is the probability that it is preferred when compared with another random item, namely  $B(i) := \frac{1}{K-1} \sum_{j \neq i} p_{i,j}$ . The item with the highest Borda score is called the *Borda winner*. The Borda winner is intuitively appealing and always well-defined for any set of preferential probabilities. The Borda score also does not require the problem instance to obey any consistency or transitivity, and it is considered one of the most general criteria.

To identify the Borda winner, estimations of the Borda scores are needed. Since estimating the Borda score for one item requires comparing it with every other items, the sample complexity is prohibitively high when there are numerous items. On the other hand, in many real-world applications, the agent has access to side information that can assist the evaluation of  $p_{i,j}$ . For instance, an e-commerce item carries its category as well as many other attributes, and the user might have a preference for a certain category (Wang et al., 2018). For a movie, the genre and the plot as well as the directors and actors can also be taken into consideration when making choices (Liu et al., 2017).

Based on the above motivation, we consider *Generalized Linear Dueling Bandits*. At each round, the agent selects two items from a finite set of items and receives a comparison result of the preferred item. The comparisons depend on known intrinsic contexts/features associated with each pair of items. The contexts can be obtained from upstream tasks, such as topic modeling (Zhu et al., 2012) or embedding (Vasile et al., 2016). Our goal is to adaptively select items and minimize the regret with respect to the optimal item (i.e., Borda winner). Our main contributions are summarized as follows:

- We show a hardness result regarding the Borda regret minimization for the (generalized) linear model. We prove a worst-case regret lower bound  $\Omega(d^{2/3}T^{2/3})$  for our dueling bandit model, showing that even in the stochastic setting, minimizing the Borda regret is difficult. The construction and proof of the lower bound are new and might be of independent interest.
- We propose an explore-then-commit type algorithm under the stochastic setting, which can achieve a nearly matching upper bound  $\tilde{O}(d^{2/3}T^{2/3})$ . When the number of items  $K$  is small, the algorithm can also be configured to achieve a smaller regret  $\tilde{O}((d \log K)^{1/3}T^{2/3})$ .
- We propose an EXP3 type algorithm for linear dueling bandits under the adversarial setting, which can achieve a nearly matching upper bound  $\tilde{O}((d \log K)^{1/3}T^{2/3})$ .
- We conduct empirical studies to verify the correctness of our theoretical claims. Under both synthetic and real-world data settings, our algorithms can outperform all the baselines in terms of cumulative regret.

**Notation** In this paper, we use normal letters to denote scalars, lowercase bold letters to denote vectors, and uppercase bold letters to denote matrices. For a vector  $\mathbf{x}$ ,  $\|\mathbf{x}\|$  denotes its  $\ell_2$ -norm. The weighted  $\ell_2$ -norm associated with a positive-definite matrix  $\mathbf{A}$  is defined as  $\|\mathbf{x}\|_{\mathbf{A}} = \sqrt{\mathbf{x}^\top \mathbf{A} \mathbf{x}}$ . The minimum eigenvalue of a matrix  $\mathbf{A}$  is written as  $\lambda_{\min}(\mathbf{A})$ . We use standard asymptotic notations including  $O(\cdot)$ ,  $\Omega(\cdot)$ ,  $\Theta(\cdot)$ , and  $\tilde{O}(\cdot)$ ,  $\tilde{\Omega}(\cdot)$ ,  $\tilde{\Theta}(\cdot)$  will hide logarithmic factors. For a positive integer  $N$ ,  $[N] := \{1, 2, \dots, N\}$ .

## 2 Related Work

**Multi-armed and Contextual Bandits** Multi-armed bandit is a problem of identifying the best choice in a sequential decision-making system. It has been studied in numerous ways with a wide range of applications (Even-Dar et al., 2002; Lai et al., 1985; Kuleshov and Precup, 2014). Contextual linear bandit is a special type of bandit problem where the agent is provided with side information, i.e., contexts, and rewards are assumed to have a linear structure. Various algorithms (Rusmevichientong

and Tsitsiklis, 2010; Filippi et al., 2010; Abbasi-Yadkori et al., 2011; Li et al., 2017; Jun et al., 2017) have been proposed to utilize this contextual information.

**Dueling Bandits and Its Performance Metrics** Dueling bandits is a variant of MAB with preferential feedback (Yue et al., 2012; Zoghi et al., 2014a, 2015). A comprehensive survey can be found at Bengs et al. (2021). As discussed previously, the probabilistic structure of a dueling bandits problem is governed by the preference probabilities, over which an optimal item needs to be defined. Optimality under the *Borda score* criteria has been adopted by several previous works (Jamieson et al., 2015; Falahatgar et al., 2017a; Heckel et al., 2018; Saha et al., 2021a). The most relevant work to ours is Saha et al. (2021a), where they studied the problem of regret minimization for adversarial dueling bandits and proved a  $T$ -round Borda regret upper bound  $\tilde{O}(K^{1/3}T^{2/3})$ . They also provide an  $\Omega(K^{1/3}T^{2/3})$  lower bound for stationary dueling bandits using Borda regret.

Apart from the Borda score, *Copeland score* is also a widely used criteria (Urvoy et al., 2013; Zoghi et al., 2015, 2014b; Wu and Liu, 2016; Komiyama et al., 2016). It is defined as  $C(i) := \frac{1}{K-1} \sum_{j \neq i} \mathbb{1}\{p_{i,j} > 1/2\}$ . A Copeland winner is the item that beats the most number of other items. It can be viewed as a “thresholded” version of Borda winner. In addition to Borda and Copeland winners, optimality notions such as a von Neumann winner were also studied in Ramamohan et al. (2016); Dudík et al. (2015); Balsubramani et al. (2016).

Another line of work focuses on identifying the optimal item or the total ranking, assuming the preference probabilities are consistent. Common consistency conditions include Strong Stochastic Transitivity (Yue et al., 2012; Falahatgar et al., 2017a,b), Weak Stochastic Transitivity (Falahatgar et al., 2018; Ren et al., 2019; Wu et al., 2022; Lou et al., 2022), Relaxed Stochastic Transitivity (Yue and Joachims, 2011) and Stochastic Triangle Inequality. Sometimes the aforementioned transitivity can also be implied by some structured models like the Bradley–Terry model. We emphasize that these consistency conditions are not assumed or implicitly implied in our setting.

**Contextual Dueling Bandits** In Dudík et al. (2015), contextual information is incorporated in the dueling bandits framework. Later, Saha (2021) studied a structured contextual dueling bandits setting where each item  $i$  has its own contextual vector  $\mathbf{x}_i$  (sometimes called Linear Stochastic Transitivity). Each item then has an intrinsic score  $v_i$  equal to the linear product of an unknown parameter vector  $\boldsymbol{\theta}^*$  and its contextual vector  $\mathbf{x}_i$ . The preference probability between two items  $i$  and  $j$  is assumed to be  $\mu(v_i - v_j)$  where  $\mu(\cdot)$  is the logistic function. These intrinsic scores of items naturally define a ranking over items. The regret is also computed as the gap between the scores of pulled items and the best item. While in this paper, we assume that the contextual vectors are associated with item pairs and define regret on the Borda score. In Section A.1, we provide a more detailed discussion showing that the setting considered in Saha (2021) can be viewed as a special case of our model.

### 3 Backgrounds and Preliminaries

#### 3.1 Problem Setting

We first consider the stochastic preferential feedback model with  $K$  items in the fixed time horizon setting. We denote the item set by  $[K]$  and let  $T$  be the total number of rounds. At each round  $t$ , the agent can pick any pair of items  $(i_t, j_t)$  to compare and receive stochastic feedback about whether item  $i_t$  is preferred over item  $j_t$ , (denoted by  $i_t \succ j_t$ ). We denote the probability of seeing the event  $i \succ j$  as  $p_{i,j} \in [0, 1]$ . Naturally, we assume  $p_{i,j} + p_{j,i} = 1$ , and  $p_{i,i} = 1/2$ .

In this paper, we are concerned with the generalized linear model (GLM), where there is assumed to exist an *unknown* parameter  $\boldsymbol{\theta}^* \in \mathbb{R}^d$ , and each pair of items  $(i, j)$  has its own *known* contextual/feature vector  $\boldsymbol{\phi}_{i,j} \in \mathbb{R}^d$  with  $\|\boldsymbol{\phi}_{i,j}\| \leq 1$ . There is also a fixed known link function (sometimes called comparison function)  $\mu(\cdot)$  that is monotonically increasing and satisfies  $\mu(x) + \mu(-x) = 1$ , e.g. a linear function or the logistic function  $\mu(x) = 1/(1 + e^{-x})$ . The preference probability is defined as  $p_{i,j} = \mu(\boldsymbol{\phi}_{i,j}^\top \boldsymbol{\theta}^*)$ . At each round, denote  $r_t = \mathbb{1}\{i_t \succ j_t\}$ , then we have

$$\mathbb{E}[r_t | i_t, j_t] = p_{i_t, j_t} = \mu(\boldsymbol{\phi}_{i_t, j_t}^\top \boldsymbol{\theta}^*).$$

Then our model can also be written as

$$r_t = \mu(\boldsymbol{\phi}_{i_t, j_t}^\top \boldsymbol{\theta}^*) + \epsilon_t,$$

where the noises  $\{\epsilon_t\}_{t \in [T]}$  are zero-mean, 1-sub-Gaussian and assumed independent from each other. Note that, given the constraint  $p_{i,j} + p_{j,i} = 1$ , it is implied that  $\phi_{i,j} = -\phi_{j,i}$  for any  $i \in [K], j \in [K]$ .

The agent's goal is to maximize the cumulative Borda score. The (slightly modified <sup>1</sup>) Borda score of item  $i$  is defined as  $B(i) = \frac{1}{K} \sum_{j=1}^K p_{i,j}$ , and the Borda winner is defined as  $i^* = \operatorname{argmax}_{i \in [K]} B(i)$ . The problem of merely identifying the Borda winner was deemed trivial (Zoghi et al., 2014a; Busa-Fekete et al., 2018) because for a fixed item  $i$ , uniformly random sampling  $j$  and receiving feedback  $r_{i,j} = \text{Bernoulli}(p_{i,j})$  yield a Bernoulli random variable with its expectation being the Borda score  $B(i)$ . This so-called *Borda reduction* trick makes identifying the Borda winner as easy as the best-arm identification for  $K$ -armed bandits. Moreover, if the regret is defined as  $\text{Regret}(T) = \sum_{t=1}^T (B(i^*) - B(i_t))$ , then any optimal algorithms for multi-arm bandits can achieve  $\tilde{O}(\sqrt{T})$  regret.

However, the above definition of regret does not respect the fact that a pair of items are selected at each round. When the agent chooses two items to compare, it is natural to define the regret so that both items contribute equally. A commonly used regret, e.g., in Saha et al. (2021a), has the following form:

$$\text{Regret}(T) = \sum_{t=1}^T (2B(i^*) - B(i_t) - B(j_t)), \quad (1)$$

where the regret is defined as the sum of the sub-optimality of both selected arms. Sub-optimality is measured by the gap between the Borda scores of the compared items and the Borda winner. This form of regret deems any classical multi-arm bandit algorithm with Borda reduction vacuous because taking  $j_t$  into consideration will invoke  $\Theta(T)$  regret.

**Adversarial Setting** Saha et al. (2021b) considered an adversarial setting for the multi-armed case, where at each round  $t$ , the comparison follows a potentially different probability model, denoted by  $\{p_{i,j}^t\}_{i,j \in [K]}$ . In this paper, we consider its contextual counterpart. Formally, we assume there is an underlying parameter  $\theta_t^*$ , and at round  $t$ , the preference probability is defined as  $p_{i,j}^t = \mu(\phi_{i,j}^\top \theta_t^*)$ .

The Borda score of item  $i \in [K]$  at round  $t$  is defined as  $B_t(i) = \frac{1}{K} \sum_{j=1}^K p_{i,j}^t$ , and the Borda winner at round  $T$  is defined as  $i^* = \operatorname{argmax}_{i \in [K]} \sum_{t=1}^T B_t(i)$ . The  $T$ -round regret is thus defined as  $\text{Regret}(T) = \sum_{t=1}^T (2B_t(i^*) - B_t(i_t) - B_t(j_t))$ .

### 3.2 Assumptions

In this section, we present the assumptions required for establishing theoretical guarantees. Due to the fact that the analysis technique is largely extracted from Li et al. (2017), we follow them to make assumptions to enable regret minimization for generalized linear dueling bandits.

We make a regularity assumption about the distribution of the contextual vectors:

**Assumption 1.** There exists a constant  $\lambda_0 > 0$  such that  $\lambda_{\min}(\frac{1}{K^2} \sum_{i=1}^K \sum_{j=1}^K \phi_{i,j} \phi_{i,j}^\top) \geq \lambda_0$ .

This assumption is only utilized to initialize the design matrix  $\mathbf{V}_\tau = \sum_{t=1}^\tau \phi_{i_t, j_t} \phi_{i_t, j_t}^\top$  so that the minimum eigenvalue is large enough. We follow Li et al. (2017) to deem  $\lambda_0$  as a constant.

We also need the following assumption regarding the link function  $\mu(\cdot)$ :

**Assumption 2.** Let  $\dot{\mu}$  be the first-order derivative of  $\mu$ . We have  $\kappa := \inf_{\|\mathbf{x}\| \leq 1, \|\theta - \theta^*\| \leq 1} \dot{\mu}(\mathbf{x}^\top \theta) > 0$ .

Assuming  $\kappa > 0$  is necessary to ensure the maximum log-likelihood estimator can converge to the true parameter  $\theta^*$  (Li et al., 2017, Section 3). This type of assumption is commonly made in previous works for generalized linear models (Filippi et al., 2010; Li et al., 2017; Fauray et al., 2020).

Another common assumption is regarding the continuity and smoothness of the link function.

<sup>1</sup>Previous works define Borda score as  $B'_i = \frac{1}{K-1} \sum_{j \neq i} p_{i,j}$ , excluding the diagonal term  $p_{i,i} = 1/2$ . Our definition is equivalent since the difference between two items satisfies  $B(i) - B_j = \frac{K-1}{K} (B'_i - B'_j)$ . Therefore, the regret will be in the same order for both definitions.

180 **Assumption 3.**  $\mu$  is twice differentiable. Its first and second-order derivatives are upper-bounded by  
 181 constants  $L_\mu$  and  $M_\mu$  respectively.

182 This is a very mild assumption. For example, it is easy to verify that the logistic link function satisfies  
 183 Assumption 3 with  $L_\mu = M_\mu = 1/4$ .

## 184 4 The Hardness Result

$$\begin{array}{l}
 \text{"good"} \\
 \left\{ \begin{array}{c|c} \frac{1}{2} \cdots \frac{1}{2} & \begin{array}{c} \frac{3}{4} + \langle \phi_{i,j}, \theta \rangle \\ \vdots \\ \frac{1}{2} \cdots \frac{1}{2} \end{array} \\ \hline \frac{1}{2} \cdots \frac{1}{2} & \begin{array}{c} \frac{3}{4} + \langle \phi_{j,i}, \theta \rangle \\ \vdots \\ \frac{1}{2} \cdots \frac{1}{2} \end{array} \end{array} \right.
 \end{array}$$

Figure 1: Illustration of the hard-to-learn preference probability matrix  $\{p_{i,j}^\theta\}_{i \in [K], j \in [K]}$ . There are  $K = 2^{d+1}$  items in total. The first  $2^d$  items are “good” items with higher Borda scores, and the last  $2^d$  items are “bad” items. The upper right block  $\{p_{i,j}\}_{i < 2^d, j \geq 2^d}$  is defined as shown in the blue bubble. The lower left block satisfies  $p_{i,j} = 1 - p_{j,i}$ . For any  $\theta$ , there exist one and only best item  $i$  such that  $\text{bit}(i) = \text{sign}(\theta)$ .

185 This section presents Theorem 4, a worst-case regret lower bound for the stochastic linear dueling  
 186 bandits. The proof of Theorem 4 relies on a class of hard instances, as shown in Figure 1. We show  
 187 that any algorithm will incur a certain amount of regret when applied to this hard instance class. The  
 188 constructed hard instances follow a stochastic linear model, which is a sub-class of the generalized  
 189 linear model. Saha et al. (2021b) first proposed a similar construction for finite many arms with no  
 190 contexts. Our construction is for a contextual setting and the proof of the lower bound takes a rather  
 191 different route.

192 For any  $d > 0$ , we construct the class of hard instances as follows. An instance is specified by a vector  
 193  $\theta \in \{-\Delta, +\Delta\}^d$ . The instance contains  $2^{d+1}$  items (indexed from 0 to  $2^{d+1} - 1$ ). The preference  
 194 probability for an instance is defined by  $p_{i,j}^\theta$  as:

$$p_{i,j}^\theta = \begin{cases} \frac{1}{2}, & \text{if } i < 2^d, j < 2^d \text{ or if } i \geq 2^d, j \geq 2^d \\ \frac{3}{4}, & \text{if } i < 2^d, j \geq 2^d \\ \frac{1}{4}, & \text{if } i \geq 2^d, j < 2^d \end{cases} + \langle \phi_{i,j}, \theta \rangle,$$

195 and the  $d$ -dimensional feature vectors  $\phi_{i,j}$  are given by

$$\phi_{i,j} = \begin{cases} \mathbf{0}, & \text{if } i < 2^d, j < 2^d \text{ or if } i \geq 2^d, j \geq 2^d \\ \text{bit}(i), & \text{if } i < 2^d, j \geq 2^d \\ -\text{bit}(j), & \text{if } i \geq 2^d, j < 2^d, \end{cases}$$

196 where  $\text{bit}(\cdot)$  is the (shifted) bit representation of non-negative integers, i.e., suppose  $x$  has the binary  
 197 representation  $x = b_0 \times 2^0 + b_1 \times 2^1 + \cdots + b_{d-1} \times 2^{d-1}$ , then

$$\text{bit}(x) = (2b_0 - 1, 2b_1 - 1, \dots, 2b_{d-1} - 1) = 2\mathbf{b} - \mathbf{1}.$$

198 Note that  $\text{bit}(\cdot) \in \{-1, +1\}^d$ , and that  $\phi_{i,j} = -\phi_{j,i}$  is satisfied. The definition of  $p_{i,j}^\theta$  can be slightly  
 199 tweaked to fit exactly the model described in Section 3 (see Remark 11 in Appendix).

200 Some calculation shows that the Borda scores of the  $2^{d+1}$  items are:

$$B^\theta(i) = \begin{cases} \frac{5}{8} + \frac{1}{2} \langle \text{bit}(i), \theta \rangle, & \text{if } i < 2^d, \\ \frac{3}{8}, & \text{if } i \geq 2^d. \end{cases}$$

201 Intuitively, the former half of items (those indexed from 0 to  $2^d - 1$ ) are “good” items (one among  
 202 them is optimal, others are nearly optimal), while the latter half of items are “bad” items. Under  
 203 such hard instances, every time one of the two pulled items is a “bad” item, then a one-step regret

204  $B^\theta(i^*) - B^\theta(i) \geq 1/4$  is incurred. To minimize regret, we should thus try to avoid pulling “bad”  
 205 items. However, in order to identify the best item among all “good” items, comparisons between  
 206 “good” and “bad” items are necessary. The reason is simply that comparisons between “good” items  
 207 give no information about the Borda scores as the comparison probabilities are  $p_{i,j}^\theta = \frac{1}{2}$  for all  
 208  $i, j < 2^d$ . Hence, any algorithm that can decently distinguish among the “good” items has to pull  
 209 “bad” ones for a fair amount of times, and large regret is thus incurred. A similar observation is also  
 210 made by Saha et al. (2021a).

211 This specific construction emphasizes the intrinsic hardness of Borda regret minimization: to dif-  
 212 ferentiate the best item from its close competitors, the algorithm must query the bad items to gain  
 213 information.

214 Formally, this class of hard instances leads to the following regret lower bound for both stochastic  
 215 and adversarial settings:

216 **Theorem 4.** For any algorithm  $\mathcal{A}$ , there exists a hard instance  $\{p_{i,j}^\theta\}$  with  $T > 4d^2$ , such that  $\mathcal{A}$  will  
 217 incur expected regret at least  $\Omega(d^{2/3}T^{2/3})$ .

218 The construction of this hard instance for linear dueling bandits is inspired by the worst-case lower  
 219 bound for the stochastic linear bandit (Dani et al., 2008), which has the order  $\Omega(d\sqrt{T})$ , while ours is  
 220  $\Omega(d^{2/3}T^{2/3})$ . The difference is that for the linear or multi-armed stochastic bandit, eliminating bad  
 221 arms can make further exploration less expensive. But in our case, any amount of exploration will  
 222 not reduce the cost of further exploration. This essentially means that exploration and exploitation  
 223 must be separate, which is also supported by the fact that a simple explore-then-commit algorithm  
 224 shown in Section 5 can be nearly optimal.

## 225 5 Stochastic Contextual Dueling Bandit

### 226 5.1 Algorithm Description

---

#### Algorithm 1 BETC-GLM

---

1: **Input:** time horizon  $T$ , number of items  $K$ , feature dimension  $d$ , feature vectors  $\phi_{i,j}$  for  $i \in [K]$ ,  
 $j \in [K]$ , exploration rounds  $\tau$ , error tolerance  $\epsilon$ , failure probability  $\delta$ .  
 2: **for**  $t = 1, 2, \dots, \tau$  **do**  
 3:   sample  $i_t \sim \text{Uniform}([K])$ ,  $j_t \sim \text{Uniform}([K])$   
 4:   query pair  $(i_t, j_t)$  and receive feedback  $r_t$   
 5: **end for**  
 6: Find the G-optimal design  $\pi(i, j)$  based on  $\phi_{i,j}$  for  $i \in [K]$ ,  $j \in [K]$   
 7: Let  $N(i, j) = \left\lceil \frac{d\pi(i,j)}{\epsilon^2} \right\rceil$  for any  $(i, j) \in \text{supp}(\pi)$ , denote  $N = \sum_{i=1}^K \sum_{j=1}^K N(i, j)$   
 8: **for**  $i \in [K]$ ,  $j \in [K]$ ,  $s \in [N(i, j)]$  **do**  
 9:   set  $t \leftarrow t + 1$ , set  $(i_t, j_t) = (i, j)$   
 10:   query pair  $(i_t, j_t)$  and receive feedback  $r_t$   
 11: **end for**  
 12: Calculate the empirical MLE estimator  $\hat{\theta}_{\tau+N}$  based on all  $\tau + N$  samples via (2)  
 13: Estimate the Borda score for each item:

$$\hat{B}(i) = \frac{1}{K} \sum_{j=1}^K \mu(\phi_{i,j}^\top \hat{\theta}_{\tau+N}), \quad \hat{i} = \underset{i \in [K]}{\operatorname{argmax}} \hat{B}(i)$$

14: Keep querying  $(\hat{i}, \hat{i})$  for the rest of the time.

---

227 We propose an algorithm named Borda Explore-Then-Commit for Generalized Linear Models  
 228 (BETC-GLM), presented in Algorithm 1. Our algorithm is inspired by the algorithm for generalized  
 229 linear models proposed by Li et al. (2017).

230 At the high level, Algorithm 1 can be divided into two phases: the exploration phase (Line 2-11)  
 231 and the exploitation phase (Line 12-14). The exploration phase ensures that the MLE estimator  $\hat{\theta}$   
 232 is accurate enough so that the estimated Borda score is within  $\tilde{O}(\epsilon)$ -range of the true Borda score

(ignoring other quantities). Then the exploitation phase simply chooses the empirical Borda winner to incur small regret.

During the exploration phase, the algorithm first performs “pure exploration” (Line 2-5), which can be seen as an initialization step for the algorithm. The purpose of this step is to ensure the design matrix  $\mathbf{V}_{\tau+N} = \sum_{t=1}^{\tau+N} \phi_{i_t, j_t} \phi_{i_t, j_t}^\top$  is positive definite.

After that, the algorithm will perform the “designed exploration”. Line 6 will find the G-optimal design, which minimizes the objective function  $g(\pi) = \max_{i,j} \|\phi_{i,j}\|_{\mathbf{V}(\pi)^{-1}}^2$ , where  $\mathbf{V}(\pi) := \sum_{i,j} \pi(i,j) \phi_{i,j} \phi_{i,j}^\top$ . The G-optimal design  $\pi^*(\cdot)$  satisfies  $\|\phi_{i,j}\|_{\mathbf{V}(\pi^*)^{-1}}^2 \leq d$ , and can be efficiently approximated by the Frank-Wolfe algorithm (See Remark 8 for a detailed discussion). Then the algorithm will follow  $\pi(\cdot)$  found at Line 6 to determine how many samples (Line 7) are needed. At Line 8-11, there are in total  $N = \sum_{i=1}^K \sum_{j=1}^K N(i,j)$  samples queried, and the algorithm shall index them by  $t = \tau + 1, \tau + 2, \dots, \tau + N$ .

At Line 12, the algorithm collects all the  $\tau + N$  samples and performs the maximum likelihood estimation (MLE). For the generalized linear model, the MLE estimator  $\hat{\theta}_{\tau+N}$  satisfies:

$$\sum_{t=1}^{\tau+N} \mu(\phi_{i_t, j_t}^\top \hat{\theta}_{\tau+N}) \phi_{i_t, j_t} = \sum_{t=1}^{\tau+N} r_t \phi_{i_t, j_t}, \quad (2)$$

or equivalently, it can be determined by solving a strongly concave optimization problem:

$$\hat{\theta}_{\tau+N} \in \underset{\theta}{\operatorname{argmax}} \sum_{t=1}^{\tau+N} \left( r_t \phi_{i_t, j_t}^\top \theta - m(\phi_{i_t, j_t}^\top \theta) \right),$$

where  $m(\cdot) = \mu(\cdot)$ . For the logistic link function,  $m(x) = \log(1 + e^x)$ . As a special case of our generalized linear model, the linear model has a closed-form solution for (2). For example, if  $\mu(x) = \frac{1}{2} + x$ , i.e.  $p_{i,j} = \frac{1}{2} + \phi_{i,j}^\top \theta^*$ , then (2) becomes:

$$\hat{\theta}_{\tau+N} = \mathbf{V}_{\tau+N}^{-1} \sum_{t=1}^{\tau+N} (r_t - 1/2) \phi_{i_t, j_t},$$

where  $\mathbf{V}_{\tau+N} = \sum_{t=1}^{\tau+N} \phi_{i_t, j_t} \phi_{i_t, j_t}^\top$ .

After the MLE estimator is obtained, Line 13 will calculate the estimated Borda score  $\hat{B}(i)$  for each item based on  $\hat{\theta}_{\tau+N}$ , and pick the empirically best one.

## 5.2 A Matching Regret Upper Bound

Algorithm 1 can be configured to tightly match the worst-case lower bound. The configuration and performance are described as follows:

**Theorem 5.** Suppose Assumption 1-3 hold and  $T = \Omega(d^2)$ . For any  $\delta > 0$ , if we set  $\tau = C_4 \lambda_0^{-2} (d + \log(1/\delta))$  ( $C_4$  is a universal constant) and  $\epsilon = d^{1/6} T^{-1/3}$ , then with probability at least  $1 - 2\delta$ , Algorithm 1 will incur regret bounded by:

$$O\left(\kappa^{-1} d^{2/3} T^{2/3} \sqrt{\log(T/d\delta)}\right).$$

By setting  $\delta = T^{-1}$ , the expected regret is bounded as  $\tilde{O}(\kappa^{-1} d^{2/3} T^{2/3})$ .

For linear bandit models, such as the hard-to-learn instances in Section 4,  $\kappa$  is a universal constant. Therefore, Theorem 5 tightly matches the lower bound in Theorem 4, up to logarithmic factors.

**Remark 6** (Regret for Fewer Arms). In typical scenarios, the number of items  $K$  is not exponentially large in the dimension  $d$ . In this case, we can choose a different parameter set of  $\tau$  and  $\epsilon$  such that Algorithm 1 can achieve a smaller regret bound  $\tilde{O}(\kappa^{-1} (d \log K)^{1/3} T^{2/3})$  with smaller dependence on the dimension  $d$ . See Theorem 10 in Appendix A.2.

**Remark 7** (Regret for Infinitely Many Arms). In most practical scenarios of dueling bandits, it is adequate to consider a finite number  $K$  of items (e.g., ranking items). Nonetheless, BETC-GLM

can be easily adapted to accommodate infinitely many arms in terms of regret. We can construct a covering over all  $\phi_{i,j}$  and perform optimal design and exploration on the covering set. The resulting regret will be the same as our upper bound, i.e.,  $\tilde{O}(d^{2/3}T^{2/3})$  up to some error caused by the epsilon net argument.

**Remark 8** (Approximate G-optimal Design). Algorithm 1 assumes an exact G-optimal design  $\pi$  is obtained. In the experiments, we use the Frank-Wolfe algorithm to solve the constraint optimization problem (See Algorithm 5, Appendix G.3). To find a policy  $\pi$  such that  $g(\pi) \leq (1 + \varepsilon)g(\pi^*)$ , roughly  $O(d/\varepsilon)$  optimization steps are needed. Such a near-optimal design will introduce a factor of  $(1 + \varepsilon)^{1/3}$  into the upper bounds.

## 6 Adversarial Contextual Dueling Bandit

This section addresses Borda regret minimization under the adversarial setting. As we introduced in Section 3.1, the unknown parameter  $\theta_t$  can vary for each round  $t$ , while the contextual vectors  $\phi_{i,j}$  are fixed.

Our proposed algorithm, BEXP3, is designed for the contextual linear model. Formally, at round  $t$  and given pair  $(i, j)$ , we have  $p_{i,j}^t = \frac{1}{2} + \langle \phi_{i,j}, \theta_t^* \rangle$ .

### 6.1 Algorithm Description

---

#### Algorithm 2 BEXP3

---

- 1: **Input:** time horizon  $T$ , number of items  $K$ , feature dimension  $d$ , feature vectors  $\phi_{i,j}$  for  $i \in [K]$ ,  $j \in [K]$ , learning rate  $\eta$ , exploration parameter  $\gamma$ .
- 2: **Initialize:**  $q_1(i) = \frac{1}{K}$ .
- 3: **for**  $t = 1, \dots, T$  **do**
- 4:   Sample items  $i_t \sim q_t, j_t \sim q_t$ .
- 5:   Query pair  $(i_t, j_t)$  and receive feedback  $r_t$
- 6:   Calculate  $Q_t = \sum_{i \in [K]} \sum_{j \in [K]} q_t(i) q_t(j) \phi_{i,j} \phi_{i,j}^\top$ ,  $\hat{\theta}_t = Q_t^{-1} \phi_{i_t, j_t} r_t$ .
- 7:   Calculate the (shifted) Borda score estimates  $\hat{B}_t(i) = \langle \frac{1}{K} \sum_{j \in [K]} \phi_{i,j}, \hat{\theta}_t \rangle$ .
- 8:   Update for all  $i \in [K]$ , set

$$\tilde{q}_{t+1}(i) = \frac{\exp(\eta \sum_{l=1}^t \hat{B}_l(i))}{\sum_{j \in [K]} \exp(\eta \sum_{l=1}^t \hat{B}_l(j))}; \quad q_{t+1}(i) = (1 - \gamma) \tilde{q}_{t+1}(i) + \frac{\gamma}{K}.$$

9: **end for**

---

Algorithm 2 is adapted from the DEXP3 algorithm in Saha et al. (2021b), which deals with the adversarial multi-armed dueling bandit. Algorithm 2 maintains a distribution  $q_t(\cdot)$  over  $[K]$ , initialized as uniform distribution (Line 2). At every round  $t$ , two items are chosen following  $q_t$  independently. Then Line 6 calculates the one-sample unbiased estimate  $\hat{\theta}_t$  of the true underlying parameter  $\theta_t^*$ . Line 7 further calculates the unbiased estimate of the (shifted) Borda score. Note that the true Borda score at round  $t$  satisfies  $B_t(i) = \frac{1}{2} + \langle \frac{1}{K} \sum_{j \in [K]} \phi_{i,j}, \theta_t^* \rangle$ .  $\hat{B}_t$  instead only estimates the second term of the Borda score. This is a choice to simplify the proof. The cumulative estimated score  $\sum_{l=1}^t \hat{B}_l(i)$  can be seen as the estimated cumulative reward of item  $i$  at round  $t$ . In Line 8,  $q_{t+1}$  is defined by the classic exponential weight update, along with a uniform exploration policy controlled by  $\gamma$ .

### 6.2 Upper Bounds

Algorithm 2 can also be configured to tightly match the worst-case lower bound:

**Theorem 9.** Suppose Assumption 1 holds. If we set  $\eta = (\log K)^{2/3} d^{-1/3} T^{-2/3}$  and  $\gamma = \sqrt{\eta d / \lambda_0} = (\log K)^{1/3} d^{1/3} T^{-1/3} \lambda_0^{-1/2}$ , then the expected regret is upper-bounded by

$$O((d \log K)^{1/3} T^{2/3}).$$

Note that the lower bound construction is for the linear model and has  $K = O(2^d)$ , thus exactly matching the upper bound.

## 7 Experiments

This section compares the proposed algorithm BETC-GLM with existing ones that are capable of minimizing Borda regret. We use random responses (generated from fixed preferential matrices) to interact with all tested algorithms. Each algorithm is run for 50 times over a time horizon of  $T = 10^6$ . We report both the mean and the standard deviation of the cumulative Borda regret and supply some analysis. The following list summarizes all methods we studies in this section, a more complete description of the methods and parameters are available in Appendix E: BETC-GLM(-MATCH): Algorithm 1 proposed in this paper with different parameters. UCB-BORDA: The UCB algorithm (Auer et al., 2002) using *Borda reduction*. DEXP3: Dueling-Exp3 developed by Saha et al. (2021a). ETC-BORDA: A simple explore-then-commit algorithm that does not take any contextual information into account. BEXP3: The proposed method for adversarial Borda bandits displayed in Algorithm 2.

**Generated Hard Case** We first test the algorithms on the hard instances constructed in Section 4. We generate  $\theta^*$  randomly from  $\{-\Delta, +\Delta\}^d$  with  $\Delta = \frac{1}{4d}$  so that the comparison probabilities  $p_{i,j}^{\theta^*} \in [0, 1]$  for all  $i, j \in [K]$ . We pick the dimension  $d = 6$  and the number of arms is therefore  $K = 2^{d+1} = 128$ . Note the dual usage of  $d$  in our construction and the model setup in Section 3.1. We refer readers to Remark 11 in Appendix B for more details.

As depicted in Figure 2a, the proposed algorithms (BETC-GLM, BEXP3) outperform the baseline algorithms in terms of cumulative regret when reaching the end of time horizon  $T$ . For UCB-BORDA, since it is not tailored for the dueling regret definition, it suffers from a linear regret as its second arm is always sampled uniformly at random, leading to a constant regret per round. DEXP3 and ETC-BORDA are two algorithms designed for  $K$ -armed dueling bandits. Both are unable to utilize contextual information and thus demand more exploration. As expected, their regrets are higher than BETC-GLM or BEXP3.

**Real-world Dataset** To showcase the performance of the algorithms in a real-world setting, we use EventTime dataset (Zhang et al., 2016). In this dataset,  $K = 100$  historical events are compared in a pairwise fashion by crowd-sourced workers. We first calculate the empirical preference probabilities  $\tilde{p}_{i,j}$  from the collected responses, and construct a generalized linear model based on the empirical preference probabilities. The algorithms are tested under this generalized linear model. Due to space limitations, more details are deferred to Appendix F.

As depicted in Figure 2b, the proposed algorithm BETC-GLM outperforms the baseline algorithms in terms of cumulative regret when reaching the end of time horizon  $T$ . The other proposed algorithm BEXP3 performs equally well even when misspecified (the algorithm is designed for linear setting, while the comparison probability follows a logistic model).

## 8 Conclusion and Future Work

In this paper, we introduced Borda regret into the generalized linear dueling bandits setting, along with an explore-then-commit type algorithm BETC-GLM and an EXP3 type algorithm BEXP3. The algorithms can achieve a nearly optimal regret upper bound, which we corroborate with a matching lower bound. The theoretical performance of the algorithms is verified empirically. It demonstrates superior performance compared to other baseline methods.

For future works, due to the fact that our exploration scheme guarantees an accurate estimate in all directions, our work can be extended to solve the top-k recovery or ranking problem, as long as a proper notion of regret can be identified.

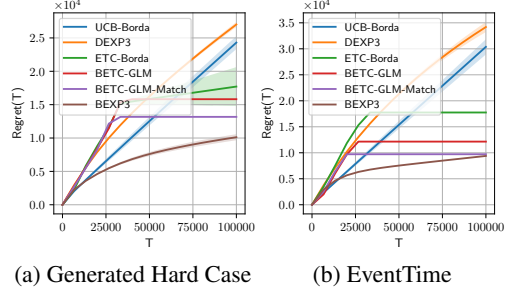

Figure 2: The regret of the proposed algorithms (BETC-GLM, BEXP3) and the baseline algorithms (UCB-BORDA, DEXP3, ETC-BORDA).

## References

- ABBASI-YADKORI, Y., PÁL, D. and SZEPESVARI, C. (2011). Improved algorithms for linear stochastic bandits. In *NIPS*.
- AUER, P., CESA-BIANCHI, N. and FISCHER, P. (2002). Finite-time analysis of the multiarmed bandit problem. *Machine Learning* **47** 235–256.
- BALSUBRAMANI, A., KARNIN, Z., SCHAPIRE, R. E. and ZOGHI, M. (2016). Instance-dependent regret bounds for dueling bandits. In *Conference on Learning Theory*. PMLR.
- BENGIS, V., BUSA-FEKETE, R., EL MESAUDI-PAUL, A. and HÜLLERMEIER, E. (2021). Preference-based online learning with dueling bandits: A survey. *Journal of Machine Learning Research* **22** 7–1.
- BUSA-FEKETE, R., HÜLLERMEIER, E. and MESAUDI-PAUL, A. E. (2018). Preference-based online learning with dueling bandits: A survey. *ArXiv* **abs/1807.11398**.
- CHEN, X., BENNETT, P. N., COLLINS-THOMPSON, K. and HORVITZ, E. (2013). Pairwise ranking aggregation in a crowdsourced setting. In *Proceedings of the sixth ACM international conference on Web search and data mining*.
- DANI, V., HAYES, T. P. and KAKADE, S. M. (2008). Stochastic linear optimization under bandit feedback. In *Annual Conference Computational Learning Theory*.
- DUDÍK, M., HOFMANN, K., SCHAPIRE, R. E., SLIVKINS, A. and ZOGHI, M. (2015). Contextual dueling bandits. *ArXiv* **abs/1502.06362**.
- EVEN-DAR, E., MANNOR, S. and MANSOUR, Y. (2002). Pac bounds for multi-armed bandit and markov decision processes. In *Annual Conference Computational Learning Theory*.
- FALAHATGAR, M., HAO, Y., ORLITSKY, A., PICHAPATI, V. and RAVINDRAKUMAR, V. (2017a). Maxing and ranking with few assumptions. *Advances in Neural Information Processing Systems* **30**.
- FALAHATGAR, M., JAIN, A., ORLITSKY, A., PICHAPATI, V. and RAVINDRAKUMAR, V. (2018). The limits of maxing, ranking, and preference learning. In *International conference on machine learning*. PMLR.
- FALAHATGAR, M., ORLITSKY, A., PICHAPATI, V. and SURESH, A. T. (2017b). Maximum selection and ranking under noisy comparisons. In *International Conference on Machine Learning*. PMLR.
- FAURY, L., ABEILLE, M., CALAUZÈNES, C. and FERCOQ, O. (2020). Improved optimistic algorithms for logistic bandits. In *International Conference on Machine Learning*. PMLR.
- FILIPPI, S., CAPPE, O., GARIVIER, A. and SZEPESVÁRI, C. (2010). Parametric bandits: The generalized linear case. *Advances in Neural Information Processing Systems* **23**.
- HECKEL, R., SIMCHOWITZ, M., RAMCHANDRAN, K. and WAINWRIGHT, M. (2018). Approximate ranking from pairwise comparisons. In *International Conference on Artificial Intelligence and Statistics*. PMLR.
- JAMIESON, K., KATARIYA, S., DESHPANDE, A. and NOWAK, R. (2015). Sparse dueling bandits. In *Artificial Intelligence and Statistics*. PMLR.
- JUN, K.-S., BHARGAVA, A., NOWAK, R. and WILLETT, R. (2017). Scalable generalized linear bandits: Online computation and hashing. *Advances in Neural Information Processing Systems* **30**.
- KOMIYAMA, J., HONDA, J. and NAKAGAWA, H. (2016). Copeland dueling bandit problem: Regret lower bound, optimal algorithm, and computationally efficient algorithm. In *International Conference on Machine Learning*. PMLR.
- KULESHOV, V. and PRECUP, D. (2014). Algorithms for multi-armed bandit problems. *arXiv preprint arXiv:1402.6028*.

394 LAI, T. L., ROBBINS, H. ET AL. (1985). Asymptotically efficient adaptive allocation rules. *Advances*  
395 *in applied mathematics* **6** 4–22.

396 LATTIMORE, T. and SZEPESVÁRI, C. (2020). *Bandit Algorithms*. Cambridge University Press.

397 LI, L., LU, Y. and ZHOU, D. (2017). Provably optimal algorithms for generalized linear contextual  
398 bandits. In *International Conference on Machine Learning*. PMLR.

399 LIU, C., JIN, T., HOI, S. C. H., ZHAO, P. and SUN, J. (2017). Collaborative topic regression for  
400 online recommender systems: an online and bayesian approach. *Machine Learning* **106** 651–670.

401 LOU, H., JIN, T., WU, Y., XU, P., GU, Q. and FARNOUD, F. (2022). Active ranking without strong  
402 stochastic transitivity. *Advances in neural information processing systems* .

403 MINKA, T. P., CLEVEN, R. and ZAYKOV, Y. (2018). Trueskill 2: An improved bayesian skill rating  
404 system.

405 RAMAMOCHAN, S., RAJKUMAR, A. and AGARWAL, S. (2016). Dueling bandits: Beyond condorcet  
406 winners to general tournament solutions. In *NIPS*.

407 REN, W., LIU, J. K. and SHROFF, N. (2019). On sample complexity upper and lower bounds for  
408 exact ranking from noisy comparisons. *Advances in Neural Information Processing Systems* **32**.

409 RUSMEVICHIENTONG, P. and TSITSIKLIS, J. N. (2010). Linearly parameterized bandits. *Mathemat-*  
410 *ics of Operations Research* **35** 395–411.

411 SAHA, A. (2021). Optimal algorithms for stochastic contextual preference bandits. *Advances in*  
412 *Neural Information Processing Systems* **34** 30050–30062.

413 SAHA, A., KOREN, T. and MANSOUR, Y. (2021a). Adversarial dueling bandits. *ArXiv*  
414 **abs/2010.14563**.

415 SAHA, A., KOREN, T. and MANSOUR, Y. (2021b). Adversarial dueling bandits. In *International*  
416 *Conference on Machine Learning*. PMLR.

417 SUI, Y. and BURDICK, J. (2014). Clinical online recommendation with subgroup rank feedback. In  
418 *Proceedings of the 8th ACM conference on recommender systems*.

419 URVOY, T., CLÉROT, F., FÉRAUD, R. and NAAMANE, S. (2013). Generic exploration and k-armed  
420 voting bandits. In *ICML*.

421 VASILE, F., SMIRNOVA, E. and CONNEAU, A. (2016). Meta-prod2vec: Product embeddings  
422 using side-information for recommendation. In *Proceedings of the 10th ACM conference on*  
423 *recommender systems*.

424 WANG, J., HUANG, P., ZHAO, H., ZHANG, Z., ZHAO, B. and LEE (2018). Billion-scale commodity  
425 embedding for e-commerce recommendation in alibaba. *Proceedings of the 24th ACM SIGKDD*  
426 *International Conference on Knowledge Discovery & Data Mining* .

427 WU, H. and LIU, X. (2016). Double thompson sampling for dueling bandits. *ArXiv* **abs/1604.07101**.

428 WU, Y., JIN, T., LOU, H., XU, P., FARNOUD, F. and GU, Q. (2022). Adaptive sampling for  
429 heterogeneous rank aggregation from noisy pairwise comparisons. In *International Conference on*  
430 *Artificial Intelligence and Statistics*. PMLR.

431 YUE, Y., BRODER, J., KLEINBERG, R. D. and JOACHIMS, T. (2012). The k-armed dueling bandits  
432 problem. *J. Comput. Syst. Sci.* **78** 1538–1556.

433 YUE, Y. and JOACHIMS, T. (2009). Interactively optimizing information retrieval systems as a  
434 dueling bandits problem. In *Proceedings of the 26th Annual International Conference on Machine*  
435 *Learning*.

436 YUE, Y. and JOACHIMS, T. (2011). Beat the mean bandit. In *International Conference on Machine*  
437 *Learning*.

- 438 ZHANG, X., LI, G. and FENG, J. (2016). Crowdsourced top-k algorithms: An experimental  
439 evaluation. *Proc. VLDB Endow.* **9** 612–623.
- 440 ZHU, J., AHMED, A. and XING, E. P. (2012). Medlda: maximum margin supervised topic models.  
441 *J. Mach. Learn. Res.* **13** 2237–2278.
- 442 ZOGHI, M., KARNIN, Z. S., WHITESON, S. and DE RIJKE, M. (2015). Copeland dueling bandits.  
443 In *NIPS*.
- 444 ZOGHI, M., WHITESON, S., MUNOS, R. and DE RIJKE, M. (2014a). Relative upper confidence  
445 bound for the k-armed dueling bandit problem. *ArXiv* **abs/1312.3393**.
- 446 ZOGHI, M., WHITESON, S., MUNOS, R. and RIJKE, M. (2014b). Relative upper confidence bound  
447 for the k-armed dueling bandit problem. In *International conference on machine learning*. PMLR.

## A Additional Results and Discussion

### A.1 Existing Results for Structured Contexts

A structural assumption made by some previous works (Saha, 2021) is that  $\phi_{i,j} = \mathbf{x}_i - \mathbf{x}_j$ , where  $\mathbf{x}_i$  can be seen as some feature vectors tied to the item. In this work, we do not consider minimizing the Borda regret under the structural assumption.

The immediate reason is that, when  $p_{i,j} = \mu(\mathbf{x}_i^\top \boldsymbol{\theta}^* - \mathbf{x}_j^\top \boldsymbol{\theta}^*)$ , with  $\mu(\cdot)$  being the logistic function, the probability model  $p_{i,j}$  effectively becomes (a linear version of) the well-known Bradley-Terry model. Namely, each item is tied to a value  $v_i = \mathbf{x}_i^\top \boldsymbol{\theta}^*$ , and the comparison probability follows  $p_{i,j} = \frac{e^{v_i}}{e^{v_i} + e^{v_j}}$ . More importantly, this kind of model satisfies both the strong stochastic transitivity (SST) and the stochastic triangle inequality (STI), which are unlikely to satisfy in reality.

Furthermore, when stochastic transitivity holds, there is a true ranking among the items, determined by  $\mathbf{x}_i^\top \boldsymbol{\theta}^*$ . A true ranking renders concepts like the Borda winner or Copeland winner redundant because the rank-one item will always be the winner in every sense. When  $\phi_{i,j} = \mathbf{x}_i - \mathbf{x}_j$ , Saha (2021) proposed algorithms that can achieve nearly optimal regret  $\tilde{O}(d\sqrt{T})$ , with regret being defined as

$$\text{Regret}(T) = \sum_{t=1}^T 2\langle \mathbf{x}_{i^*}, \boldsymbol{\theta}^* \rangle - \langle \mathbf{x}_{i_t}, \boldsymbol{\theta}^* \rangle - \langle \mathbf{x}_{j_t}, \boldsymbol{\theta}^* \rangle, \quad (3)$$

where  $i^* = \arg\max_i \langle \mathbf{x}_i, \boldsymbol{\theta}^* \rangle$ , which also happens to be the Borda winner. Meanwhile, by Assumption 3,

$$B(i^*) - B(j) = \frac{1}{K} \sum_{k=1}^K [\mu(\langle \mathbf{x}_{i^*} - \mathbf{x}_k, \boldsymbol{\theta}^* \rangle) - \mu(\langle \mathbf{x}_j - \mathbf{x}_k, \boldsymbol{\theta}^* \rangle)] \leq L_\mu \cdot \langle \mathbf{x}_{i^*} - \mathbf{x}_j, \boldsymbol{\theta}^* \rangle,$$

where  $L_\mu$  is the upper bound on the derivative of  $\mu(\cdot)$ . For logistic function  $L_\mu = 1/4$ . The Borda regret (1) is thus at most a constant multiple of (3). This shows Borda regret minimization can be sufficiently solved by Saha (2021) when structured contexts are present. We consider the most general case where the only restriction is the implicit assumption that  $\phi_{i,j} = -\phi_{j,i}$ .

### A.2 Regret Bound for Fewer Arms

In typical scenarios, the number of items  $K$  is not exponentially large in the dimension  $d$ . If this is the case, then we can choose a different parameter set of  $\tau$  and  $\epsilon$  such that Algorithm 1 can achieve a regret bound depending on  $\log K$ , and reduce the dependence on  $d$ . The performance can be characterized by the following theorem:

**Theorem 10.** For any  $\delta > 0$ , suppose the number of total rounds  $T$  satisfies,

$$T \geq \frac{C_3}{\kappa^6 \lambda_0^{3/2}} \max \left\{ d^{5/2}, \frac{\log(K^2/\delta)}{\sqrt{d}} \right\}, \quad (4)$$

where  $C_3$  is some large enough universal constant. Then if we set  $\tau = (d \log(K/\delta))^{1/3} T^{2/3}$  and  $\epsilon = d^{1/3} T^{-1/3} \log(3K^2/\delta)^{-1/6}$ , Algorithm 1 will incur regret bounded by:

$$O(\kappa^{-1} (d \log(K/\delta))^{1/3} T^{2/3}).$$

By setting  $\delta = T^{-1}$ , the expected regret is bounded as  $\tilde{O}(\kappa^{-1} (d \log K)^{1/3} T^{2/3})$ .

## B Omitted Proof in Section 4

The proof relies on a class of hard-to-learn instances. We first present the construction again for completeness.

For any  $d > 0$ , we construct a hard instance with  $2^{d+1}$  items (indexed from 0 to  $2^{d+1} - 1$ ). We construct the hard instance  $p_{i,j}^\theta$  for any  $\theta \in \{-\Delta, +\Delta\}^d$  as:

$$p_{i,j}^\theta = \begin{cases} \frac{1}{2}, & \text{if } i < 2^d, j < 2^d \\ \frac{1}{2}, & \text{if } i \geq 2^d, j \geq 2^d \\ \frac{3}{4}, & \text{if } i < 2^d, j \geq 2^d \\ \frac{1}{4}, & \text{if } i \geq 2^d, j < 2^d \end{cases} + \langle \phi_{i,j}, \theta \rangle, \quad (5)$$

where the feature vectors  $\phi_{i,j}$  and the parameter  $\theta$  are of dimension  $d$ , and have the following forms:

$$\phi_{i,j} = \begin{cases} 0, & \text{if } i < 2^d, j < 2^d \\ 0, & \text{if } i \geq 2^d, j \geq 2^d \\ \mathbf{bit}(i), & \text{if } i < 2^d, j \geq 2^d \\ -\mathbf{bit}(j), & \text{if } i \geq 2^d, j < 2^d, \end{cases}$$

where  $\mathbf{bit}(\cdot)$  is the (shifted) bit representation of non-negative integers, i.e., suppose  $x = b_0 \times 2^0 + b_1 \times 2^1 + \dots + b_{d-1} \times 2^{d-1}$ , then  $\mathbf{bit}(x) = 2b - 1$ . Note that  $\mathbf{bit}(\cdot) \in \{-1, +1\}^d$ , and  $\phi_{i,j} = -\phi_{j,i}$ .

**Remark 11** ( $d + 1$ -dimensional instance). The hard instance described above does not strictly satisfy the assumption that  $p_{i,j}^\theta = \langle \theta, \phi_{i,j} \rangle$ , but can be easily fixed by appending an additional dimension to address the bias term defined in (5). More specifically, we can set  $F(x) = \frac{1}{2} + x$  and  $p_{i,j}^\theta = F(\langle \tilde{\phi}_{i,j}, \tilde{\theta} \rangle)$ , where  $\tilde{\theta} \in \{-\Delta, +\Delta\}^d \times \{\frac{1}{4}\} \subset \mathbb{R}^{d+1}$  and  $\tilde{\phi}_{i,j} = (\phi_{i,j}, c_{i,j})$ , with

$$c_{i,j} = \begin{cases} 0, & \text{if } i < 2^d, j < 2^d \\ 0, & \text{if } i \geq 2^d, j \geq 2^d \\ 1, & \text{if } i < 2^d, j \geq 2^d \\ -1, & \text{if } i \geq 2^d, j < 2^d. \end{cases} \quad \text{To ensure } \|\tilde{\phi}_{i,j}\|_2 \leq 1, \text{ we can further set } \tilde{\phi}_{i,j} \leftarrow (d+1)^{-1/2} \tilde{\phi}_{i,j}$$

and  $\tilde{\theta} \leftarrow (d+1)^{1/2} \tilde{\theta}$ .

We rewrite (5) as:

$$p_{i,j}^\theta = \begin{cases} \frac{1}{2}, & \text{if } i < 2^d, j < 2^d \\ \frac{1}{2}, & \text{if } i \geq 2^d, j \geq 2^d \\ \frac{3}{4}, & \text{if } i < 2^d, j \geq 2^d \\ \frac{1}{4}, & \text{if } i \geq 2^d, j < 2^d \end{cases} + \begin{cases} 0, & \text{if } i < 2^d, j < 2^d \\ 0, & \text{if } i \geq 2^d, j \geq 2^d \\ \langle \mathbf{bit}(i), \theta \rangle, & \text{if } i < 2^d, j \geq 2^d \\ -\langle \mathbf{bit}(j), \theta \rangle, & \text{if } i \geq 2^d, j < 2^d, \end{cases} \quad (6)$$

and the Borda scores are:

$$B^\theta(i) = \begin{cases} \frac{5}{8} + \frac{1}{2} \langle \mathbf{bit}(i), \theta \rangle, & \text{if } i < 2^d, \\ \frac{3}{8}, & \text{if } i \geq 2^d. \end{cases}$$

Intuitively, the former half arms indexed from 0 to  $2^d - 1$  are “good” arms (one among them is optimal), while the latter half arms are “bad” arms. It is clear that choosing a “bad” arm  $i$  will incur regret  $B(i^*) - B(i) \geq 1/4$ .

Now we are ready to present the proof.

*Proof of Theorem 4.* First, we present the following lemma:

**Lemma 12.** Under the hard instance we constructed above, for any algorithm  $\mathcal{A}$  that ever makes queries  $i_t \geq 2^d$ , there exists another algorithm  $\mathcal{A}'$  that only makes queries  $i_t < 2^d$  for every  $t > 0$  and always achieves no larger regret than  $\mathcal{A}$ .

*Proof of Lemma 12.* The proof is done by reduction. For any algorithm  $\mathcal{A}$ , we wrap  $\mathcal{A}$  with such a agent  $\mathcal{A}'$ :

1. If  $\mathcal{A}$  queries  $(i_t, j_t)$  with  $i_t < 2^d$ , the agent  $\mathcal{A}'$  will pass the same query  $(i_t, j_t)$  to the environment and send the feedback  $r_t$  to  $\mathcal{A}$ ;
2. If  $\mathcal{A}$  queries  $(i_t, j_t)$  with  $i_t \geq 2^d, j_t < 2^d$ , the agent  $\mathcal{A}'$  will pass the query  $(j_t, i_t)$  to the environment and send the feedback  $1 - r_t$  to  $\mathcal{A}$ ;
3. If  $\mathcal{A}$  queries  $(i_t, j_t)$  with  $i_t \geq 2^d, j_t \geq 2^d$ , the agent  $\mathcal{A}'$  will uniform-randomly choose  $i'_t$  from 0 to  $2^d - 1$ , pass the query  $(i'_t, i'_t)$  to the environment and send the feedback  $r_t$  to  $\mathcal{A}$ .

For each of the cases defined above, the probabilistic model of bandit feedback for  $\mathcal{A}$  is the same as if  $\mathcal{A}$  is directly interacting with the original environment. For Case 1, the claim is trivial. For Case 2, the claim holds because of the symmetry of our model, that is  $p_{i,j}^\theta = 1 - p_{j,i}^\theta$ . For Case 3, both will

513 return  $r_t$  following Bernoulli(1/2). Therefore, the expected regret of  $\mathcal{A}$  in this environment wrapped  
 514 by  $\mathcal{A}'$  is equal to the regret of  $\mathcal{A}$  in the original environment.

515 Meanwhile, we will show  $\mathcal{A}'$  will incur no larger regret than  $\mathcal{A}$ . For the first two cases,  $\mathcal{A}'$  will  
 516 incur the same one-step regret as  $\mathcal{A}$ . For the third case, we know that  $B^\theta(i_t) = B^\theta(j_t) = \frac{3}{8}$ ,  
 517 while  $\mathbb{E}[B^\theta(i'_t)] = \frac{5}{8} + \frac{1}{2} \langle \mathbb{E}_{i'_t}[\mathbf{bit}(i'_t)], \theta \rangle = \frac{5}{8} + \frac{1}{2} \langle \mathbf{0}, \theta \rangle = \frac{5}{8}$ , meaning that the one-step regret is  
 518 smaller.  $\square$

519 Lemma 12 ensures it is safe to assume  $i_t < 2^d$ . For any  $\theta$  and  $k \in [d]$ , define

$$\mathbb{P}_{\theta,k} := \mathbb{P}_\theta \left( \sum_{t=1}^T \mathbb{1}\{\mathbf{bit}^{[k]}(i_t) \neq \text{sign}(\theta^{[k]})\} \geq \frac{T}{2} \right),$$

520 where the superscript  $^{[k]}$  over a vector denotes taking the  $k$ -th entry of the vector. Meanwhile, we  
 521 define  $\theta^{\setminus k}$  to satisfy  $(\theta^{\setminus k})^{[k]} = -\theta^{[k]}$  and be the same as  $\theta$  at all other entries. We have

$$\begin{aligned} \mathbb{P}_{\theta^{\setminus k},k} &:= \mathbb{P}_{\theta^{\setminus k}} \left( \sum_{t=1}^T \mathbb{1}\{\mathbf{bit}^{[k]}(i_t) \neq \text{sign}((\theta^{\setminus k})^{[k]})\} \geq \frac{T}{2} \right) \\ &= \mathbb{P}_{\theta^{\setminus k}} \left( \sum_{t=1}^T \mathbb{1}\{\mathbf{bit}^{[k]}(i_t) = \text{sign}(\theta^{[k]})\} \geq \frac{T}{2} \right) \\ &= \mathbb{P}_{\theta^{\setminus k}} \left( \sum_{t=1}^T \mathbb{1}\{\mathbf{bit}^{[k]}(i_t) \neq \text{sign}(\theta^{[k]})\} < \frac{T}{2} \right). \end{aligned}$$

522 By the Bretagnolle–Huber inequality and the decomposition of the relative entropy, we have

$$\begin{aligned} \mathbb{P}_{\theta,k} + \mathbb{P}_{\theta^{\setminus k},k} &\geq \frac{1}{2} \exp \left( -\text{KL}(\mathbb{P}_{\theta,\mathcal{A}} \parallel \mathbb{P}_{\theta^{\setminus k},\mathcal{A}}) \right) \\ &\geq \frac{1}{2} \exp \left( -\mathbb{E}_\theta \left[ \sum_{t=1}^T \text{KL}(p_{i_t,j_t}^\theta \parallel p_{i_t,j_t}^{\theta^{\setminus k}}) \right] \right) \\ &\geq \frac{1}{2} \exp \left( -\mathbb{E}_\theta \left[ \sum_{t=1}^T C \langle \phi_{i_t,j_t}, \theta - \theta^{\setminus k} \rangle^2 \right] \right) \\ &= \frac{1}{2} \exp \left( -\mathbb{E}_\theta \left[ 40\Delta^2 \sum_{t=1}^T \mathbb{1}\{i_t < 2^d \wedge j_t \geq 2^d\} \right] \right), \end{aligned}$$

523 where the first inequality comes from the Bretagnolle–Huber inequality; the second inequality is the  
 524 decomposition of the relative entropy; the third inequality holds because the Bernoulli KL divergence  
 525  $\text{KL}(p \parallel p+x)$  is 10-strongly convex in  $x$  for any fixed  $p \in [1/8, 7/8]$ , and indeed  $p_{i_t,j_t}^\theta \in [1/8, 7/8]$   
 526 as long as  $d\Delta \leq 1/8$ ; the last equation holds because  $\phi_{i_t,j_t}$  has non-zero entries only when  $(i_t, j_t)$   
 527 belongs to that specific regions.

528 From now on, we denote  $N(T) := \sum_{t=1}^T \mathbb{1}\{i_t < 2^d \wedge j_t \geq 2^d\}$ . Further averaging over all  
 529  $\theta \in \{-1, +1\}^d$ , we have

$$\begin{aligned} \frac{1}{2^d} \sum_{\theta \in \{-1, +1\}^d} \mathbb{P}_{\theta,k} &\geq \frac{1}{4} \frac{1}{2^d} \sum_{\theta \in \{-1, +1\}^d} \exp \left( -40\Delta^2 \mathbb{E}_\theta[N(T)] \right) \\ &\geq \frac{1}{4} \exp \left( -40\Delta^2 \frac{1}{2^d} \sum_{\theta \in \{-1, +1\}^d} \mathbb{E}_\theta[N(T)] \right), \end{aligned}$$

530 where the first inequality is from averaging over all  $\theta$ ; the second inequality is from Jensen's  
 531 inequality.

Utilizing the inequality above, we establish that

$$\begin{aligned}
\frac{1}{2^d} \sum_{\boldsymbol{\theta} \in \{-1, +1\}^d} \text{Regret}(T; \boldsymbol{\theta}, \mathcal{A}) &\geq \frac{1}{2^d} \sum_{\boldsymbol{\theta} \in \{-1, +1\}^d} \mathbb{E}_{\boldsymbol{\theta}} \left[ \sum_{t=1}^T B^{\boldsymbol{\theta}}(i^*) - B^{\boldsymbol{\theta}}(i_t) \right] \\
&= \frac{1}{2^d} \sum_{\boldsymbol{\theta} \in \{-1, +1\}^d} \mathbb{E}_{\boldsymbol{\theta}} \left[ \sum_{t=1}^T \langle \boldsymbol{\theta}, \text{sign}(\boldsymbol{\theta}) - \text{bit}(i_t) \rangle \right] \\
&= \frac{1}{2^d} \sum_{\boldsymbol{\theta} \in \{-1, +1\}^d} \mathbb{E}_{\boldsymbol{\theta}} \left[ \sum_{t=1}^T \sum_{k=1}^d 2\Delta \mathbb{1}\{\text{bit}^{[k]}(i_t) \neq \text{sign}(\boldsymbol{\theta}^{[k]})\} \right] \\
&= \frac{2\Delta}{2^d} \sum_{\boldsymbol{\theta} \in \{-1, +1\}^d} \sum_{k=1}^d \mathbb{E}_{\boldsymbol{\theta}} \left[ \sum_{t=1}^T \mathbb{1}\{\text{bit}^{[k]}(i_t) \neq \text{sign}(\boldsymbol{\theta}^{[k]})\} \right] \\
&\geq \frac{2\Delta}{2^d} \sum_{\boldsymbol{\theta} \in \{-1, +1\}^d} \sum_{k=1}^d \mathbb{P}_{\boldsymbol{\theta}, k} \cdot \frac{T}{2} \\
&\geq \frac{\Delta d T}{4} \exp \left( -40\Delta^2 \frac{1}{2^d} \sum_{\boldsymbol{\theta} \in \{-1, +1\}^d} \mathbb{E}_{\boldsymbol{\theta}}[N(T)] \right), \tag{7}
\end{aligned}$$

where the first inequality comes from the Borda regret; the second inequality comes from the inequality  $\mathbb{E}[X] \geq a\mathbb{P}(X \geq a)$  for any non-negative random variable; the last inequality is from rearranging terms and invoking the results above.

Meanwhile, we have (remember  $N(T) := \sum_{t=1}^T \mathbb{1}\{i_t < 2^d \wedge j_t \geq 2^d\}$ )

$$\begin{aligned}
\frac{1}{2^d} \sum_{\boldsymbol{\theta} \in \{-1, +1\}^d} \text{Regret}(T; \boldsymbol{\theta}, \mathcal{A}) &\geq \frac{1}{2^d} \sum_{\boldsymbol{\theta} \in \{-1, +1\}^d} \mathbb{E}_{\boldsymbol{\theta}} \left[ \frac{1}{4} \sum_{t=1}^T \mathbb{1}\{i_t < 2^d \wedge j_t \geq 2^d\} \right] \\
&= \frac{1}{4} \frac{1}{2^d} \sum_{\boldsymbol{\theta} \in \{-1, +1\}^d} \mathbb{E}_{\boldsymbol{\theta}}[N(T)], \tag{8}
\end{aligned}$$

where the first inequality comes from that any items  $i \geq 2^d$  will incur at least  $1/4$  regret.

Combining (7) and (8) together and denoting that  $X = \frac{1}{2^d} \sum_{\boldsymbol{\theta} \in \{-1, +1\}^d} \mathbb{E}_{\boldsymbol{\theta}}[N(T)]$ , we have that for any algorithm  $\mathcal{A}$ , there exists some  $\boldsymbol{\theta}$ , such that (set  $\Delta = \frac{d^{-1/3}T^{-1/3}}{\sqrt{40}}$ )

$$\begin{aligned}
\text{Regret}(T; \boldsymbol{\theta}, \mathcal{A}) &\geq \max \left\{ \frac{\Delta d T}{4} \exp(-40\Delta^2 X), \frac{X}{4} \right\} \\
&= \max \left\{ \frac{d^{2/3}T^{2/3}}{4\sqrt{40}} \exp(-d^{-2/3}T^{-2/3}X), \frac{X}{4} \right\} \\
&\geq \frac{d^{2/3}T^{2/3}}{4\sqrt{40}} \max \left\{ \exp(-d^{-2/3}T^{-2/3}X), d^{-2/3}T^{-2/3}X \right\} \\
&\geq \frac{d^{2/3}T^{2/3}}{8\sqrt{40}},
\end{aligned}$$

where the first inequality is the combination of (7) and (8); the second inequality is a rearrangement and loosely lower bounds the constant; the last is due to  $\max\{e^{-y}, y\} > 1/2$  for any  $y$ .  $\square$

## C Omitted Proof in Section 5

We first introduce the lemma about the theoretical guarantee of G-optimal design: given an action set  $\mathcal{X} \subseteq \mathbb{R}^d$  that is compact and  $\text{span}(\mathcal{X}) = \mathbb{R}^d$ . A fixed design  $\pi(\cdot) : \mathcal{X} \rightarrow [0, 1]$  satisfies  $\sum_{\mathbf{x} \in \mathcal{X}} \pi(\mathbf{x}) = 1$ . Define  $\mathbf{V}(\pi) := \sum_{\mathbf{x} \in \mathcal{X}} \pi(\mathbf{x}) \mathbf{x} \mathbf{x}^\top$  and  $g(\pi) := \max_{\mathbf{x} \in \mathcal{X}} \|\mathbf{x}\|_{\mathbf{V}(\pi)^{-1}}^2$ .

**Lemma 13** (The Kiefer–Wolfowitz Theorem, Section 21.1, Lattimore and Szepesvári (2020)). There exists an optimal design  $\pi^*(\cdot)$  such that  $|\text{supp}(\pi)| \leq d(d+1)/2$ , and satisfies:

1.  $g(\pi^*) = d$ .
2.  $\pi^*$  is the minimizer of  $g(\cdot)$ .

The following lemma is also useful to show that under mild conditions, the minimum eigenvalue of the design matrix can be lower-bounded:

**Lemma 14** (Proposition 1, Li et al. 2017). Define  $\mathbf{V}_\tau = \sum_{t=1}^\tau \phi_{i_t, j_t}^\top \phi_{i_t, j_t}$ , where each  $(i_t, j_t)$  is drawn i.i.d. from some distribution  $\nu$ . Suppose  $\lambda_{\min}(\mathbb{E}_{(i,j) \sim \nu}[\phi_{i,j}^\top \phi_{i,j}]) \geq \lambda_0$ , and

$$\tau \geq \left( \frac{C_1 \sqrt{d} + C_2 \sqrt{\log(1/\delta)}}{\lambda_0} \right)^2 + \frac{2B}{\lambda_0},$$

where  $C_1$  and  $C_2$  are some universal constants. Then with probability at least  $1 - \delta$ ,

$$\lambda_{\min}(\mathbf{V}_\tau) \geq B.$$

### C.1 Proof of Theorem 5

The proof relies on the following lemma to establish an upper bound on  $|\langle \phi_{i,j}, \hat{\boldsymbol{\theta}}_{\tau+N} - \boldsymbol{\theta}^* \rangle|$ .

**Lemma 15** (extracted from Lemma 3, Li et al. (2017)). Suppose  $\lambda_{\min}(\mathbf{V}_{\tau+N}) \geq 1$ . For any  $\delta > 0$ , with probability at least  $1 - \delta$ , we have

$$\|\hat{\boldsymbol{\theta}}_{\tau+N} - \boldsymbol{\theta}^*\|_{\mathbf{V}_{\tau+N}} \leq \frac{1}{\kappa} \sqrt{\frac{d}{2} \log(1 + 2(\tau + N)/d) + \log(1/\delta)}.$$

*Proof of Theorem 5.* The proof can be divided into three steps: 1. invoke Lemma 14 to show that the initial  $\tau$  rounds for exploration will guarantee  $\lambda_{\min}(\mathbf{V}_\tau) \geq 1$ ; 2. invoke Lemma 13 to obtain an optimal design  $\pi$  and utilize Cauchy-Schwartz inequality to show that  $|\langle \hat{\boldsymbol{\theta}}_{\tau+N} - \boldsymbol{\theta}, \phi_{i,j} \rangle| \leq 3\epsilon/\kappa$ ; 3. balance the not yet determined  $\epsilon$  to obtain the regret upper bound.

Since we set  $\tau$  such that

$$\begin{aligned} \tau &= C_4 \lambda_0^{-2} (d + \log(1/\delta)) \\ &\geq \left( \frac{C_1 \sqrt{d} + C_2 \sqrt{\log(1/\delta)}}{\lambda_0} \right)^2 + \frac{2}{\lambda_0}, \end{aligned}$$

with a large enough universal constant  $C_4$ , by Lemma 14 to obtain that with probability at least  $1 - \delta$ ,

$$\lambda_{\min}(\mathbf{V}_\tau) \geq 1. \tag{9}$$

From now on, we assume (9) always holds.

Define  $N := \sum_{i,j} N(i, j)$ ,  $\mathbf{V}_{\tau+1:\tau+N} := \sum_{t=\tau+1}^{\tau+N} \phi_{i_t, j_t}^\top \phi_{i_t, j_t}$ ,  $\mathbf{V}_{\tau+N} := \mathbf{V}_\tau + \mathbf{V}_{\tau+1:\tau+N}$ . Given the optimal design  $\pi(i, j)$ , the algorithm queries the pair  $(i, j) \in \text{supp}(\pi)$  for exactly  $N(i, j) = \lceil d\pi(i, j)/\epsilon^2 \rceil$  times. Therefore, the design matrix  $\mathbf{V}_{\tau+N}$  satisfies

$$\begin{aligned} \mathbf{V}_{\tau+N} &\succeq \mathbf{V}_{\tau+1:\tau+N} \\ &= \sum_{i,j} N(i, j) \phi_{i,j} \phi_{i,j}^\top \\ &\succeq \sum_{i,j} \frac{d\pi(i, j)}{\epsilon^2} \phi_{i,j} \phi_{i,j}^\top \\ &= \frac{d}{\epsilon^2} \mathbf{V}(\pi), \end{aligned}$$

where  $\mathbf{V}(\pi) := \sum_{i,j} \pi(i, j) \phi_{i,j} \phi_{i,j}^\top$ . The first inequality holds because  $\mathbf{V}_\tau$  is positive semi-definite, and the second inequality holds due to the choice of  $N(i, j)$ .

571 When (9) holds, from Lemma 15, we have with probability at least  $1 - \delta$ , that for each  $\phi_{i,j}$ ,

$$\begin{aligned}
|\langle \hat{\theta} - \theta^*, \phi_{i,j} \rangle| &\leq \|\hat{\theta}_{\tau+N} - \theta^*\|_{\mathbf{V}_{\tau+N}} \cdot \|\phi_{i,j}\|_{\mathbf{V}_{\tau+N}^{-1}} \\
&\leq \|\hat{\theta}_{\tau+N} - \theta^*\|_{\mathbf{V}_{\tau+N}} \cdot \frac{\epsilon \|\phi_{i,j}\|_{\mathbf{V}(\pi)^{-1}}}{\sqrt{d}} \\
&\leq \|\hat{\theta}_{\tau+N} - \theta^*\|_{\mathbf{V}_{\tau+N}} \cdot \epsilon \\
&\leq \frac{\epsilon}{\kappa} \cdot \sqrt{\frac{d}{2} \log(1 + 2(\tau + N)/d) + \log(1/\delta)} \tag{10}
\end{aligned}$$

572 where the first inequality is due to the Cauchy-Schwartz inequality; the second inequality holds  
573 because  $\mathbf{V}_{\tau+N} \succeq \frac{d}{\epsilon^2} \mathbf{V}(\pi)$ ; the third inequality holds because  $\pi$  is an optimal design and by  
574 Lemma 13,  $\|\phi_{i,j}\|_{\mathbf{V}(\pi)^{-1}}^2 \leq d$ ; the last inequality comes from Lemma 15.

575 To summarize, we have that with probability at least  $1 - 2\delta$ , for every  $i \in [K]$ ,

$$\begin{aligned}
|\hat{B}(i) - B(i)| &= \left| \frac{1}{K} \sum_{j=1}^K (\mu(\phi_{i,j}^\top \theta^*) - \mu(\phi_{i,j}^\top \hat{\theta})) \right| \\
&\leq \frac{1}{K} \sum_{j=1}^K |\mu(\phi_{i,j}^\top \theta^*) - \mu(\phi_{i,j}^\top \hat{\theta})| \\
&\leq \frac{L_\mu}{K} \sum_{j=1}^K |\phi_{i,j}^\top (\theta^* - \hat{\theta})| \\
&\leq \frac{3L_\mu \epsilon}{\kappa} \cdot \sqrt{\frac{d}{2} \log(1 + 2(\tau + N)/d) + \log(1/\delta)}, \tag{11}
\end{aligned}$$

576 where the first equality is by the definition of the empirical/true Borda score; the first inequality is  
577 due to the triangle inequality; the second inequality is from the Lipschitz-ness of  $\mu(\cdot)$  ( $L_\mu = 1/4$  for  
578 the logistic function); the last inequality holds due to (10). This further implies the gap between the  
579 empirical Borda winner and the true Borda winner is bounded by:

$$\begin{aligned}
B(i^*) - B(\hat{i}) &= B(i^*) - \hat{B}(i^*) + \hat{B}(i^*) - B(\hat{i}) \\
&\leq B(i^*) - \hat{B}(i^*) + \hat{B}(\hat{i}) - B(\hat{i}) \\
&\leq \frac{6L_\mu \epsilon}{\kappa} \cdot \sqrt{\frac{d}{2} \log(1 + 2(\tau + N)/d) + \log(1/\delta)},
\end{aligned}$$

580 where the first inequality holds due to the definition of  $\hat{i}$ , i.e.,  $\hat{B}(\hat{i}) \geq \hat{B}(i)$  for any  $i$ ; the last inequality  
581 holds due to (11).

582 Meanwhile, since  $N := \sum_{(i,j) \in \text{supp}(\pi)} N(i, j)$  and  $\text{supp}(\pi) \leq d(d+1)/2$  from Lemma 13, we  
583 have that

$$N \leq d(d+1)/2 + \frac{d}{\epsilon^2},$$

584 because  $\lceil x \rceil < x + 1$ .

585 Therefore, with probability at least  $1 - 2\delta$ , the regret is bounded by:

$$\begin{aligned}
\text{Regret}(T) &= \text{Regret}_{1:\tau} + \text{Regret}_{\tau+1:\tau+N} + \text{Regret}_{\tau+N+1:T} \\
&\leq \tau + N + \frac{12L_\mu \epsilon T}{\kappa} \cdot \sqrt{\frac{d}{2} \log(1 + 2(\tau + N)/d) + \log(1/\delta)} \\
&\leq \tau + d(d+1)/2 + \frac{d}{\epsilon^2} + \frac{12L_\mu \epsilon T}{\kappa} \cdot O\left(d^{1/2} \sqrt{\log\left(\frac{T}{d\delta}\right)}\right) \\
&= O\left(\kappa^{-1} d^{2/3} T^{2/3} \sqrt{\log\left(\frac{T}{d\delta}\right)}\right),
\end{aligned}$$

where the first equation is simply dividing the regret into 3 stages: 1 to  $\tau$ ,  $\tau + 1$  to  $\tau + N$ , and  $\tau + N + 1$  to  $T$ ; the second inequality is simply bounding the one-step regret from 1 to  $\tau + N$  by 1, while for  $t > \tau + N$ , we have shown that the one-step regret is guaranteed to be smaller than  $12L_\mu\epsilon\sqrt{d\log(1+2(\tau+N)/d)} + \log(1/\delta)/\sqrt{2\kappa}$ . The last line holds because we set  $\tau = O(d + \log(1/\delta))$  and  $\epsilon = d^{1/6}T^{-1/3}$ . Note that to ensure  $\tau + N < T$ , it suffices to assume  $T = \Omega(d^2)$ .

By setting  $\delta = T^{-1}$ , we can show that the expected regret of Algorithm 1 is bounded by

$$\tilde{O}(\kappa^{-1}(d^{2/3}T^{2/3})).$$

593

□

## 594 C.2 Proof of Theorem 10

The following lemma characterizes the non-asymptotic behavior of the MLE estimator. It is extracted from Li et al. (2017).

**Lemma 16** (Theorem 1, Li et al. 2017). Define  $\mathbf{V}_s = \sum_{t=1}^s \phi_{i_t, j_t}^\top \phi_{i_t, j_t}$ , and  $\hat{\boldsymbol{\theta}}_s$  as the MLE estimator (2) at round  $s$ . If  $\mathbf{V}_s$  satisfies

$$\lambda_{\min}(\mathbf{V}_s) \geq \frac{512M_\mu^2(d^2 + \log(3/\delta))}{\kappa^4}, \quad (12)$$

then for any fixed  $\mathbf{x} \in \mathbb{R}^d$ , with probability at least  $1 - \delta$ ,

$$|\langle \hat{\boldsymbol{\theta}}_s - \boldsymbol{\theta}^*, \mathbf{x} \rangle| \leq \frac{3}{\kappa} \sqrt{\|\mathbf{x}\|_{\mathbf{V}_s^{-1}}^2 \log(3/\delta)}.$$

*Proof of Theorem 10.* The proof can be essentially divided into three steps: 1. invoke Lemma 14 to show that the initial  $\tau$  rounds for exploration will guarantee (12) is satisfied; 2. invoke Lemma 13 to obtain an optimal design  $\pi$  and utilize Lemma 16 to show that  $|\langle \hat{\boldsymbol{\theta}}_{\tau+N} - \boldsymbol{\theta}, \phi_{i,j} \rangle| \leq 3\epsilon/\kappa$ ; 3. balance the not yet determined  $\epsilon$  to obtain the regret upper bound.

First, we explain why we assume

$$T \geq \frac{C_3}{\kappa^6 \lambda_0^{3/2}} \max \left\{ d^{5/2}, \frac{\log(K^2/\delta)}{\sqrt{d}} \right\}.$$

To ensure (12) in Lemma 16 can hold, we resort to Lemma 14, that is

$$\begin{aligned} \tau &\geq \left( \frac{C_1 \sqrt{d} + C_2 \sqrt{\log(1/\delta)}}{\lambda_0} \right)^2 + \frac{2B}{\lambda_0}, \\ B &:= \frac{512M_\mu^2(d^2 + \log(3/\delta))}{\kappa^4}. \end{aligned}$$

Since we set  $\tau = (d \log(K^2/\delta))^{1/3} T^{2/3}$ , this means  $T$  should be large enough, so that

$$(d \log(K^2/\delta))^{1/3} T^{2/3} \geq \left( \frac{C_1 \sqrt{d} + C_2 \sqrt{\log(1/\delta)}}{\lambda_0} \right)^2 + \frac{1024M_\mu^2(d^2 + \log(3K^2/\delta))}{\kappa^4 \lambda_0}.$$

With a large enough universal constant  $C_3$ , it is easy to verify that the inequality above will hold as long as

$$T \geq \frac{C_3}{\kappa^6 \lambda_0^{3/2}} \max \left\{ d^{5/2}, \frac{\log(K^2/\delta)}{\sqrt{d}} \right\}.$$

By Lemma 14, we have that with probability at least  $1 - \delta$ ,

$$\lambda_{\min}(\mathbf{V}_\tau) \geq \frac{512M_\mu^2(d^2 + \log(3K^2/\delta))}{\kappa^4}. \quad (13)$$

From now on, we assume (13) always holds.

611 Define  $N := \sum_{i,j} N(i,j)$ ,  $\mathbf{V}_{\tau+1:\tau+N} := \sum_{t=\tau+1}^{\tau+N} \phi_{i_t,j_t}^\top \phi_{i_t,j_t}$ ,  $\mathbf{V}_{\tau+N} := \mathbf{V}_\tau + \mathbf{V}_{\tau+1:\tau+N}$ . Given  
 612 the optimal design  $\pi(i,j)$ , the algorithm queries each pair  $(i,j) \in \text{supp}(\pi)$  for exactly  $N(i,j) =$   
 613  $\lceil d\pi(i,j)/\epsilon^2 \rceil$  times. Therefore, the design matrix  $\mathbf{V}_{\tau+N}$  satisfies

$$\begin{aligned} \mathbf{V}_{\tau+N} &\succeq \mathbf{V}_{\tau+1:\tau+N} \\ &= \sum_{i,j} N(i,j) \phi_{i,j} \phi_{i,j}^\top \\ &\succeq \sum_{i,j} \frac{d\pi(i,j)}{\epsilon^2} \phi_{i,j} \phi_{i,j}^\top \\ &= \frac{d}{\epsilon^2} \mathbf{V}(\pi), \end{aligned}$$

614 where  $\mathbf{V}(\pi) := \sum_{i,j} \pi(i,j) \phi_{i,j} \phi_{i,j}^\top$ . The first inequality holds because  $\mathbf{V}_\tau$  is positive semi-definite,  
 615 and the second inequality holds due to the choice of  $N(i,j)$ .

616 To invoke Lemma 16, notice that  $\lambda_{\min}(\mathbf{V}) \geq \lambda_{\min}(\mathbf{V}_\tau)$ . Along with (13), by Lemma 16, we have  
 617 for any fixed  $\phi_{i,j}$ , with probability at least  $1 - \delta/K^2$ , that

$$\begin{aligned} |\langle \hat{\theta} - \theta^*, \phi_{i,j} \rangle| &\leq \frac{3}{\kappa} \sqrt{\|\phi_{i,j}\|_{\mathbf{V}_{\tau+N}^{-1}}^2 \log(3K^2/\delta)} \\ &\leq \frac{3}{\kappa} \sqrt{\frac{\epsilon^2}{d} \cdot \|\phi_{i,j}\|_{\mathbf{V}(\pi)^{-1}}^2 \log(3K^2/\delta)} \\ &= \frac{3\epsilon}{\kappa} \sqrt{\frac{\|\phi_{i,j}\|_{\mathbf{V}(\pi)^{-1}}^2}{d} \cdot \log(3K^2/\delta)} \\ &\leq \frac{3\epsilon}{\kappa} \cdot \sqrt{\log(3K^2/\delta)}, \end{aligned} \tag{14}$$

618 where the first inequality comes from Lemma 16; the second inequality holds because  $\mathbf{V}_{\tau+N} \succeq$   
 619  $\frac{d}{\epsilon^2} \mathbf{V}(\pi)$ ; the last inequality holds because  $\pi$  is an optimal design and by Lemma 13,  $\|\phi_{i,j}\|_{\mathbf{V}(\pi)^{-1}}^2 \leq$   
 620  $d$ .

621 Taking union bound for each  $(i,j) \in [K] \times [K]$ , we have that with probability at least  $1 - \delta$ , for  
 622 every  $i \in [K]$ ,

$$\begin{aligned} |\hat{B}(i) - B(i)| &= \left| \frac{1}{K} \sum_{j=1}^K (\mu(\phi_{i,j}^\top \theta^*) - \mu(\phi_{i,j}^\top \hat{\theta})) \right| \\ &\leq \frac{1}{K} \sum_{j=1}^K |\mu(\phi_{i,j}^\top \theta^*) - \mu(\phi_{i,j}^\top \hat{\theta})| \\ &\leq \frac{L_\mu}{K} \sum_{j=1}^K |\phi_{i,j}^\top (\theta^* - \hat{\theta})| \\ &\leq \frac{3L_\mu \epsilon}{\kappa} \cdot \sqrt{\log(3K^2/\delta)}, \end{aligned} \tag{15}$$

623 where the first equality is by the definition of the empirical/true Borda score; the first inequality is  
 624 due to the triangle inequality; the second inequality is from the Lipschitz-ness of  $\mu(\cdot)$  ( $L_\mu = 1/4$  for  
 625 the logistic function); the last inequality holds due to (14). This further implies the gap between the  
 626 empirical Borda winner and the true Borda winner is bounded by:

$$\begin{aligned} B(i^*) - B(\hat{i}) &= B(i^*) - \hat{B}(i^*) + \hat{B}(i^*) - B(\hat{i}) \\ &\leq B(i^*) - \hat{B}(i^*) + \hat{B}(\hat{i}) - B(\hat{i}) \\ &\leq \frac{6L_\mu \epsilon}{\kappa} \cdot \sqrt{\log(3K^2/\delta)}, \end{aligned}$$

627 where the first inequality holds due to the definition of  $\hat{i}$ , i.e.,  $\hat{B}(\hat{i}) \geq \hat{B}(i)$  for any  $i$ ; the last inequality  
 628 holds due to (15).

629 Meanwhile, since  $N := \sum_{(i,j) \in \text{supp}(\pi)} N(i,j)$  and  $\text{supp}(\pi) \leq d(d+1)/2$  from Lemma 13, we  
 630 have that

$$N \leq d(d+1)/2 + \frac{d}{\epsilon^2},$$

631 because  $\lceil x \rceil < x + 1$ .

632 Therefore, with probability at least  $1 - 2\delta$ , the regret is bounded by:

$$\begin{aligned} \text{Regret}(T) &= \text{Regret}_{1:\tau} + \text{Regret}_{\tau+1:\tau+N} + \text{Regret}_{\tau+N+1:T} \\ &\leq \tau + N + \frac{12L_\mu\epsilon}{\kappa} T \cdot \sqrt{\log(3K^2/\delta)} \\ &\leq \tau + d(d+1)/2 + \frac{d}{\epsilon^2} + \frac{12L_\mu\epsilon}{\kappa} T \cdot \sqrt{\log(3K^2/\delta)} \\ &= O(\kappa^{-1}(d \log(K/\delta))^{1/3} T^{2/3}), \end{aligned}$$

633 where the first equation is simply dividing the regret into 3 stages: 1 to  $\tau$ ,  $\tau + 1$  to  $\tau + N$ , and  
 634  $\tau + N + 1$  to  $T$ . the second inequality is simply bounding the one-step regret from 1 to  $\tau + N$   
 635 by 1, while for  $t > \tau + N$ , we have shown that the one-step regret is guaranteed to be smaller  
 636 than  $12L_\mu\epsilon\sqrt{\log(3K^2/\delta)}/\kappa$ . The last line holds because we set  $\tau = (d \log(3K^2/\delta))^{1/3} T^{2/3}$  and  
 637  $\epsilon = d^{1/3} T^{-1/3} \log(3K^2/\delta)^{-1/6}$ .

638 By setting  $\delta = T^{-1}$ , we can show that the expected regret of Algorithm 1 is bounded by

$$O(\kappa^{-1}(d \log(KT))^{1/3} T^{2/3}).$$

639 Note that if there are exponentially many contextual vectors ( $K \approx 2^d$ ), the upper bound becomes  
 640  $\tilde{O}(d^{2/3} T^{2/3})$ .  $\square$

## 641 D Omitted Proof in Section 6

642 We make the following notation. Let  $\mathcal{H}_{t-1} := (q_1, P_1, (i_1, j_1), r_1, \dots, q_t, P_t)$  denotes the history up  
 643 to time  $t$ . Here  $P_t$  means the comparison probability  $p_{i,j}^t$  at round  $t$ . The following lemmas are used  
 644 in the proof. We first bound the estimate  $\hat{B}_t(i)$ .

645 **Lemma 17.** For all  $t \in [T]$ ,  $i \in [K]$ , it holds that  $\hat{B}_t(i) \leq \lambda_0^{-1}/\gamma^2$ .

646 *Proof of Lemma 17.* Using our choice of  $q_t \geq \gamma/K$ , we have the following result for the matrix  $Q_t$ :

$$Q_t = \sum_{i \in [K]} \sum_{j \in [K]} q_t(i) q_t(j) \phi_{i,j} \phi_{i,j}^\top \succeq \gamma^2 \frac{1}{K^2} \sum_{i \in [K]} \sum_{j \in [K]} \phi_{i,j} \phi_{i,j}^\top. \quad (16)$$

647 Furthermore, we can use the definition of the estimate  $\hat{B}_t(i)$  to show that

$$\begin{aligned} \hat{B}_t(i) &= \left\langle \frac{1}{K} \sum_{j \in [K]} \phi_{i,j}, \hat{\theta}_t \right\rangle = \left\langle \frac{1}{K} \sum_{j \in [K]} \phi_{i,j}, Q_t^{-1} \phi_{i_t, j_t} \right\rangle r_t(i_t, j_t) \\ &\leq \frac{1}{K} \sum_{j \in [K]} \|\phi_{i,j}\|_{Q_t^{-1}}^2, \end{aligned}$$

648 where we use the fact that  $|r_t| \leq 1$ . Let  $\Sigma = \frac{1}{K^2} \sum_{i=1}^K \sum_{j=1}^K \phi_{i,j} \phi_{i,j}^\top$ . With (16) we have

649  $Q_t \succeq \gamma^2 \Sigma$ . Therefore, we can further bound  $\hat{B}_t(i)$  with

$$\begin{aligned} \hat{B}_t(i) &\leq \frac{1}{K\gamma^2} \sum_{j \in [K]} \|\phi_{i,j}\|_{\Sigma^{-1}}^2 \\ &\leq \frac{1}{\gamma^2} \max_{i,j} \|\phi_{i,j}\|_{\Sigma^{-1}}^2 \\ &\leq \frac{\lambda_0^{-1}}{\gamma^2}, \end{aligned}$$

650 where the first inequality holds due to (16) and that  $\|\mathbf{x}\|_{\mathbf{A}^{-1}}^2 \leq \|\mathbf{x}\|_{\mathbf{B}^{-1}}^2$  if  $\mathbf{A} \succeq \mathbf{B}$ ; the third inequality  
 651 holds because we assume  $\lambda_0 \leq \lambda_{\min}(\frac{1}{K^2} \sum_{i=1}^K \sum_{j=1}^K \phi_{i,j} \phi_{i,j}^\top)$  and  $\|\phi_{i,j}\| \leq 1$ .  $\square$

652 The following lemma proves that our (shifted) estimate is unbiased.

653 **Lemma 18.** For all  $t \in [T]$ ,  $i \in [K]$ , the following equality holds:

$$\mathbb{E}[\hat{B}_t(i)] = B_t(i) - \frac{1}{2}.$$

654 *Proof of Lemma 18.* Using our definition of  $\hat{B}_t(i)$ , we have

$$\hat{B}_t(i) = \left\langle \frac{1}{K} \sum_{j \in [K]} \phi_{i,j}, \hat{\theta}_t \right\rangle = \left\langle \frac{1}{K} \sum_{j \in [K]} \phi_{i,j}, Q_t^{-1} \phi_{i_t, j_t} \right\rangle r_t(i_t, j_t).$$

655 Therefore, by the law of total expectation (tower rule), we have

$$\begin{aligned} \mathbb{E}[\hat{B}_t(i)] &= \mathbb{E}_{\mathcal{H}_{t-1}} \left[ \mathbb{E}_{(i_t, j_t, r_t)} \left[ \left\langle \frac{1}{K} \sum_{j \in [K]} \phi_{i,j}, Q_t^{-1} \phi_{i_t, j_t} \right\rangle r_t(i_t, j_t) \middle| \mathcal{H}_{t-1} \right] \right] \\ &= \mathbb{E}_{\mathcal{H}_{t-1}} \left[ \mathbb{E}_{(i_t, j_t)} \left[ \left\langle \frac{1}{K} \sum_{j \in [K]} \phi_{i,j}, Q_t^{-1} \phi_{i_t, j_t} \right\rangle \mathbb{E}_{r_t} [r_t(i_t, j_t) | (i_t, j_t)] \middle| \mathcal{H}_{t-1} \right] \right] \\ &= \mathbb{E}_{\mathcal{H}_{t-1}} \left[ \mathbb{E}_{(i_t, j_t)} \left[ \left\langle \frac{1}{K} \sum_{j \in [K]} \phi_{i,j}, Q_t^{-1} \phi_{i_t, j_t} \right\rangle p_t(i_t, j_t) \middle| \mathcal{H}_{t-1} \right] \right] \end{aligned}$$

656 Then we use the definition of  $p_t$  and the expectation. We can further get the equality

$$\begin{aligned} \mathbb{E}[\hat{B}_t(i)] &= \mathbb{E}_{\mathcal{H}_{t-1}} \left[ \mathbb{E}_{(i_t, j_t)} \left[ \left\langle \frac{1}{K} \sum_{j \in [K]} \phi_{i,j}, Q_t^{-1} \phi_{i_t, j_t} \phi_{i_t, j_t}^\top \theta^* \right\rangle \middle| \mathcal{H}_{t-1} \right] \right] \\ &= \mathbb{E}_{\mathcal{H}_{t-1}} \left[ \left\langle \frac{1}{K} \sum_{j \in [K]} \phi_{i,j}, Q_t^{-1} \left( \sum_{i \in [K]} \sum_{j \in [K]} q_t(i) q_t(j) \phi_{i,j} \phi_{i,j}^\top \right) \theta^* \right\rangle \middle| \mathcal{H}_{t-1} \right] \\ &= \mathbb{E}_{\mathcal{H}_{t-1}} \left[ \left\langle \frac{1}{K} \sum_{j \in [K]} \phi_{i,j}, \theta^* \right\rangle \middle| \mathcal{H}_{t-1} \right] \\ &= B_t(i) - \frac{1}{2}. \end{aligned}$$

657 Therefore, we have completed the proof of Lemma 18.  $\square$

658 The following lemma is similar to Lemma 5 in Saha et al. (2021b).

659 **Lemma 19.**  $\mathbb{E}_{\mathcal{H}_t} [q_t^\top \hat{B}_t] = \mathbb{E}_{\mathcal{H}_{t-1}} [\mathbb{E}_{x \sim q_t} [B_t(x) | \mathcal{H}_{t-1}]] - \frac{1}{2}, \forall t \in [T]$ .

660 *Proof of Lemma 19.* Taking conditional expectation, we have

$$\begin{aligned} \mathbb{E}_{\mathcal{H}_t} [q_t^\top \hat{B}_t] &= \mathbb{E}_{\mathcal{H}_t} \left[ \sum_{i=1}^K q_t(i) \hat{B}_t(i) \right] \\ &= \mathbb{E}_{\mathcal{H}_{t-1}} \left[ \sum_{i=1}^K q_t(i) \mathbb{E}_{(i_t, j_t, r_t)} [\hat{B}_t(i) | \mathcal{H}_{t-1}] \right] \\ &= \mathbb{E}_{\mathcal{H}_{t-1}} \left[ \sum_{i=1}^K q_t(i) \left( B_t(i) - \frac{1}{2} \right) \right] \\ &= \mathbb{E}_{\mathcal{H}_{t-1}} [\mathbb{E}_{x \sim q_t} [B_t(x) | \mathcal{H}_{t-1}]] - \frac{1}{2}, \end{aligned}$$

661 where we use the law of total expectation again as well as Lemma 18.  $\square$

662 The last lemma bounds a summation  $\sum_{i \in [K]} q_t(i) \hat{B}_t(i)^2$ , which will be important in our proof.

663 **Lemma 20.** At any time  $t$ ,  $\mathbb{E}[\sum_{i \in [K]} q_t(i) \hat{B}_t(i)^2] \leq d/\gamma$ .

664 *Proof of Lemma 20.* Let  $\hat{P}_t(i, j) = \langle \phi_{i,j}, \hat{\theta}_t \rangle$ . Using the definition of  $\hat{B}_t$  and  $\hat{P}_t(i, j)$ , we have the  
 665 following inequality:

$$\begin{aligned} \mathbb{E} \left[ \sum_{i \in [K]} q_t(i) \hat{B}_t(i)^2 \right] &= \mathbb{E} \left[ \sum_{i \in [K]} q_t(i) \left( \frac{1}{K} \sum_{j \in [K]} \hat{P}_t(i, j) \right)^2 \right] \\ &\leq \mathbb{E} \left[ \sum_{i \in [K]} q_t(i) \frac{1}{K} \sum_{j \in [K]} \hat{P}_t^2(i, j) \right] \\ &= \mathbb{E} \left[ \sum_{i \in [K]} q_t(i) \frac{1}{\gamma} \sum_{j \in [K]} \frac{\gamma}{K} \hat{P}_t^2(i, j) \right] \\ &\leq \frac{1}{\gamma} \mathbb{E} \left[ \sum_{i \in [K]} \sum_{j \in [K]} q_t(i) q_t(j) \hat{P}_t^2(i, j) \right]. \end{aligned}$$

666 The first inequality holds due to the Cauchy-Schwartz inequality; the second inequality holds because  
 667 the definition of  $q_t$  satisfies  $q_t \geq \gamma/K$ .

668 Expanding the definition of  $\hat{P}_t^2(i, j)$ , we have

$$\begin{aligned} \hat{P}_t^2(i, j) &= r_t^2(i_t, j_t) (\phi_{i,j}^\top Q_t^{-1} \phi_{i_t, j_t})^2 \\ &\leq \phi_{i_t, j_t}^\top Q_t^{-1} \phi_{i,j} \phi_{i,j}^\top Q_t^{-1} \phi_{i_t, j_t}, \end{aligned}$$

669 where we use  $0 \leq r_t^2(i_t, j_t) \leq 1$ . Therefore, the following inequality holds,

$$\begin{aligned} \sum_{i \in [K]} \sum_{j \in [K]} q_t(i) q_t(j) \hat{P}_t^2(i, j) &\leq \sum_{i \in [K]} \sum_{j \in [K]} q_t(i) q_t(j) \phi_{i_t, j_t}^\top Q_t^{-1} \phi_{i,j} \phi_{i,j}^\top Q_t^{-1} \phi_{i_t, j_t} \\ &= \phi_{i_t, j_t}^\top Q_t^{-1} \left( \sum_{i \in [K]} \sum_{j \in [K]} q_t(i) q_t(j) \phi_{i,j} \phi_{i,j}^\top \right) Q_t^{-1} \phi_{i_t, j_t} \\ &= \phi_{i_t, j_t}^\top Q_t^{-1} \phi_{i_t, j_t} \\ &= \text{trace}(\phi_{i_t, j_t} \phi_{i_t, j_t}^\top Q_t^{-1}). \end{aligned}$$

670 Using the property of trace, we have

$$\mathbb{E} \left[ \sum_{i \in [K]} \sum_{j \in [K]} q_t(i) q_t(j) \hat{P}_t^2(i, j) \right] \leq \text{trace} \left( \sum_{i \in [K]} \sum_{j \in [K]} q_t(i) q_t(j) \phi_{i,j} \phi_{i,j}^\top Q_t^{-1} \right) = d.$$

671 Therefore, we finish the proof of Lemma 20. □

672 *Proof of Theorem 9.* Our regret is defined as follows,

$$\begin{aligned} \mathbb{E}_{\mathcal{H}_T} [R_T] &= \mathbb{E}_{\mathcal{H}_T} \left[ \sum_{t=1}^T [2B_t(i^*) - B_t(i_t) - B_t(j_t)] \right] \\ &= \max_{i \in [K]} \mathbb{E}_{\mathcal{H}_T} \left[ \sum_{t=1}^T [2B_t(i) - B_t(i_t) - B_t(j_t)] \right]. \end{aligned}$$

673 The second equality holds because  $B_t$  and  $i^*$  are independent of the randomness of the algorithm.  
 674 Furthermore, we can write the expectation of the regret as

$$\begin{aligned}
 \mathbb{E}_{\mathcal{H}_T}[R_T] &= 2 \max_{i \in [K]} \sum_{t=1}^T B_t(i) - \sum_{t=1}^T \mathbb{E}_{\mathcal{H}_T} [B_t(i_t) + B_t(j_t)] \\
 &= 2 \max_{i \in [K]} \sum_{t=1}^T B_t(i) - 2 \sum_{t=1}^T \mathbb{E}_{\mathcal{H}_{t-1}} [\mathbb{E}_{x \sim q_t} [B_t(x) | \mathcal{H}_{t-1}]] \\
 &= 2 \max_{i \in [K]} \sum_{t=1}^T \left( B_t(i) - \frac{1}{2} \right) - 2 \mathbb{E}_{\mathcal{H}_T} [q_t^\top \hat{B}_t], \tag{17}
 \end{aligned}$$

675 where the last equality is due to Lemma 19.

676 Then we follow the standard proof of EXP3 algorithm (Lattimore and Szepesvári, 2020). Let  
 677  $S_{t,k} = \sum_{s=1}^t (B_s(k) - \frac{1}{2})$ ,  $\hat{S}_{t,k} = \sum_{s=1}^t \hat{B}_s(k)$ ,  $\omega_t = \sum_{k \in [K]} \exp(-\eta \hat{S}_{t,k})$  and  $\omega_0 = K$ . We  
 678 have  $\forall a \in [K]$ ,

$$\exp(-\eta \hat{S}_{T,a}) \leq \sum_{k \in [K]} \exp(-\eta \hat{S}_{T,k}) = \omega_T = \omega_0 \cdot \prod_{t=1}^T \frac{\omega_t}{\omega_{t-1}}. \tag{18}$$

679 For each term in the product, we have

$$\begin{aligned}
 \frac{\omega_{t+1}}{\omega_t} &= \sum_{k \in [K]} \frac{\exp(-\eta \hat{S}_{t+1,k})}{\omega_t} \cdot \exp(-\eta \hat{B}_t(k)) \\
 &= \sum_{k \in [K]} \tilde{q}_t(k) \exp(-\eta \hat{B}_t(k)), \tag{19}
 \end{aligned}$$

680 where the second equality holds because of the definition of  $\tilde{q}_t$ . For any  $\eta \leq \lambda_0 \gamma^2$ , Lemma 17  
 681 presents  $|\eta \hat{B}_t(k)| \leq 1$ . Thus, using the basic inequality  $\exp(x) \leq 1 + x + x^2/2$  when  $x \leq 1$ , and  
 682  $\exp(x) \geq 1 + x$ , we have

$$\begin{aligned}
 \frac{\omega_{t+1}}{\omega_t} &\leq \sum_{k \in [K]} \tilde{q}_t(k) \left( 1 - \eta \hat{B}_t(k) + \eta^2 \hat{B}_t^2(k) \right) \\
 &= 1 - \eta \sum_{k \in [K]} \tilde{q}_t(k) \hat{B}_t(k) + \eta^2 \sum_{k \in [K]} \tilde{q}_t(k) \hat{B}_t^2(k) \\
 &\leq \exp \left( -\eta \sum_{k \in [K]} \tilde{q}_t(k) \hat{B}_t(k) + \eta^2 \sum_{k \in [K]} \tilde{q}_t(k) \hat{B}_t^2(k) \right). \tag{20}
 \end{aligned}$$

683 Combining (18), (19) and (20), we have

$$\exp(-\eta \hat{S}_{T,a}) \leq K \exp \left( \sum_{t=1}^T \left[ -\eta \sum_{k \in [K]} \tilde{q}_t(k) \hat{B}_t(k) + \eta^2 \sum_{k \in [K]} \tilde{q}_t(k) \hat{B}_t^2(k) \right] \right),$$

684 and therefore

$$\sum_{t=1}^T \hat{B}_t(a) - \sum_{t=1}^T \tilde{q}_t^\top \hat{B}_t \leq \frac{\log K}{\eta} + \eta \sum_{t=1}^T \sum_{k \in [K]} \tilde{q}_t(k) \hat{B}_t^2(k).$$

685 Since  $\tilde{q}_t = \frac{q_t - \gamma/K}{1-\gamma}$ , we have

$$(1 - \gamma) \sum_{t=1}^T \hat{B}_t(a) - \sum_{t=1}^T q_t^\top \hat{B}_t \leq \frac{\log K}{\eta} + \eta \sum_{t=1}^T \sum_{k \in [K]} \tilde{q}_t(k) \hat{B}_t^2(k).$$

686 Choosing  $a = i^*$ , changing the summation index to  $i$  and taking expectation on both sides, we have

$$(1 - \gamma)\mathbb{E}_{\mathcal{H}_T} \sum_{t=1}^T \widehat{B}_t(i^*) - \sum_{t=1}^T \mathbb{E}_{\mathcal{H}_T} [q_t^\top \widehat{B}_t] \leq \frac{\log K}{\eta} + \mathbb{E}_{\mathcal{H}_T} \left[ \eta \sum_{t=1}^T \sum_{i \in [K]} q_t(i) \widehat{B}_t^2(i) \right].$$

687 Substituting the above inequality into (17) and using Lemma 18, 19, we can bound the regret as

$$\begin{aligned} \mathbb{E}[R_T] &\leq 2\gamma T + \frac{2\log K}{\eta} + 2\eta \sum_{t=1}^T \mathbb{E}_{\mathcal{H}_T} \left[ \sum_{i \in [K]} q_t(i) s_t(i)^2 \right] \\ &\leq 2\gamma T + 2\frac{\log K}{\eta} + \frac{2\eta d T}{\gamma} \\ &\leq 2(\log K)^{1/3} d^{1/3} T^{2/3} \sqrt{1/\lambda_0} + 2(\log K)^{1/3} d^{1/3} T^{2/3} + 2(\log K)^{1/3} d^{1/3} T^{2/3} \sqrt{\lambda_0}, \end{aligned}$$

688 where the second inequality holds due to Lemma 20. In the last inequality, we put in our choice  
 689 of parameters  $\eta = (\log K)^{2/3} d^{-1/3} T^{-2/3}$  and  $\gamma = \sqrt{\eta d / \lambda_0} = (\log K)^{1/3} d^{1/3} T^{-1/3} \lambda_0^{-1/2}$ . This  
 690 finishes our proof of Theorem 9.  $\square$

## E Detailed Explanation of Studied Algorithms in Experiments

The following list summarizes all methods we implemented:

BETC-GLM(-MATCH): Algorithm 1 proposed in this paper. For general link function, to find  $\hat{\theta}$  by MLE in (2), 100 rounds of gradient descent are performed. The failure probability is set to  $\delta = 1/T$ . Parameters  $\tau$  and  $\epsilon$  are set to values listed in Theorem 10. For BETC-GLM-MATCH, we use the  $\tau$  and  $\epsilon$  outlined in Theorem 5.

UCB-BORDA: The UCB algorithm (Auer et al., 2002) using *Borda reduction* technique mentioned by Busa-Fekete et al. (2018). The complete listing is displayed in Algorithm 3.

DEXP3: Dueling-Exp3 is an adversarial Borda bandit algorithm developed by Saha et al. (2021a), which also applies to our stationary bandit case. Relevant tuning parameters are set according to their upper-bound proof.

ETC-BORDA: We devise a simple explore-then-commit algorithm, named ETC-BORDA. Like DEXP3, ETC-BORDA does not take any contextual information into account. The complete procedure of ETC-BORDA is displayed in Algorithm 4, Appendix G.2. The failure probability  $\delta$  is optimized as  $1/T$ .

BEXP3: The proposed method for adversarial Borda bandits displayed in Algorithm 2.  $\eta$  and  $\gamma$  are chosen to be the value stated in Theorem 9.

## F Real-world Data Experiments

To showcase the performance of the algorithms in a real-world setting, we use EventTime dataset (Zhang et al., 2016). In this dataset,  $K = 100$  historical events are compared in a pairwise fashion by crowd-sourced workers.

We first calculate the empirical preference probabilities  $\tilde{p}_{i,j}$  from the collected responses. A visualized preferential matrix consisting of  $\tilde{p}_{i,j}$  is shown in Figure 5 in Appendix F.1, which demonstrates that STI and SST conditions hardly hold in reality. During simulation,  $\tilde{p}_{i,j}$  is the parameter of the Bernoulli distribution that is used to generate the responses whenever a pair  $(i, j)$  is queried. The contextual vectors  $\phi_{i,j}$  are generated randomly from  $\{-1, +1\}^5$ . For simplicity, we assign the item pairs that have the same probability value with the same contextual vector, i.e., if  $\tilde{p}_{i,j} = \tilde{p}_{k,l}$  then  $\phi_{i,j} = \phi_{k,l}$ . The MLE estimator  $\hat{\theta}$  in (2) is obtained to construct the recovered preference probability  $\hat{p}_{i,j} := \mu(\phi_{i,j}^\top \hat{\theta})$  where  $\mu(x) = 1/(1 + e^{-x})$  is the logistic function. We ensure that the recovered preference probability  $\hat{p}_{i,j}$  is close to  $\tilde{p}_{i,j}$ , so that  $\phi_{i,j}$  are informative enough. As shown in Figure 3, our algorithm outperforms the baseline methods as expected. In particular, the gap between our algorithm and the baselines is even larger than that under the generated hard case. In both settings, our algorithms demonstrated a stable performance with negligible variance.

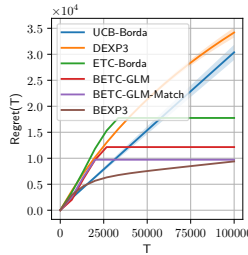

Figure 3: EventTime

Figure 4: The regret of the proposed algorithm (BETC-GLM, BEXP3) and the baseline algorithms (UCB-BORDA, DEXP3, ETC-BORDA).

### F.1 Data Visualization

The events in EventTime dataset are ordered by the time they occurred. In Figure 5, the magnitude of each  $\tilde{p}_{i,j}$  is color coded. It is apparent that there is no total/consistent ordering (i.e.,  $\tilde{p}_{i,j} > \frac{1}{2} \Leftrightarrow i \succ j$ )

727 can be inferred from this matrix due to inconsistencies in the ordering and many potential paradoxes.  
 728 Hence STI and SST can hardly hold in this case.

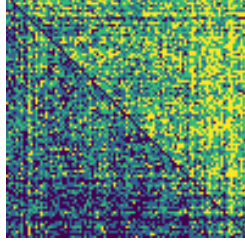

Figure 5: Estimated preferential matrix consists of  $\tilde{p}_{i,j}$  from the EventTime dataset.

## 729 G Additional Information for Experiments

### 730 G.1 The UCB-BORDA Algorithm

731 The UCB-BORDA procedure, displayed in Algorithm 3 is a UCB algorithm with Borda reduction  
 732 only capable of minimization of regret in the following form:

$$\text{Regret}(T) = \sum_{t=1}^T (B(i^*) - B(i_t)).$$

733 Let  $\mathbf{n}_i$  be the number of times arm  $i \in [K]$  has been queried. Let  $\mathbf{w}_i$  be the number of times arm  $i$   
 734 wins the duel.  $\hat{B}(i)$  is the estimated Borda score.  $\alpha$  is set to 0.3 in all experiments.

---

#### Algorithm 3 UCB-BORDA

---

- 1: **Input:** time horizon  $T$ , number of items  $K$ , exploration parameter  $\alpha$ .
  - 2: **Initialize:**  $\mathbf{n} = \mathbf{w} = \{0\}^K$ ,  $\hat{B}(i) = \frac{1}{2}, i \in [K]$
  - 3: **for**  $t = 1, 2, \dots, T$  **do**
  - 4:    $i_t = \operatorname{argmax}_{k \in [K]} (\hat{B}_k + \sqrt{\frac{\alpha \log(t)}{\mathbf{n}_k}})$
  - 5:   sample  $j_t \sim \text{Uniform}([K])$
  - 6:   query pair  $(i_t, j_t)$  and receive feedback  $r_t \sim \text{Bernoulli}(p_{i_t, j_t})$
  - 7:    $\mathbf{n}_{i_t} = \mathbf{n}_{i_t} + 1$ ,  $\mathbf{w}_{i_t} = \mathbf{w}_{i_t} + r_t$ ,  $\hat{B}(i_t) = \frac{\mathbf{w}_{i_t}}{\mathbf{n}_{i_t}}$
  - 8: **end for**
- 

### 735 G.2 The ETC-BORDA Algorithm

736 The ETC-BORDA procedure, displayed in Algorithm 4 is an explore-then-commit type algorithm  
 737 capable of minimizing the Borda dueling regret. It can be shown that the regret of Algorithm 4 is  
 738  $\tilde{O}(K^{1/3}T^{2/3})$ .

---

**Algorithm 4** ETC-BORDA

---

```
1: Input: time horizon  $T$ , number of items  $K$ , target failure probability  $\delta$ 
2: Initialize:  $\mathbf{n} = \mathbf{w} = \{0\}^K$ ,  $\hat{B}(i) = \frac{1}{2}$ ,  $i \in [K]$ 
3: Set  $N = \lceil K^{-2/3} T^{2/3} \log(K/\delta)^{1/3} \rceil$ 
4: for  $t = 1, 2, \dots, T$  do
5:   Choose action  $i_t \leftarrow \begin{cases} 1 + (t-1) \bmod K, & \text{if } t \leq KN, \\ \operatorname{argmax}_{i \in [K]} \hat{B}(i), & \text{if } t > KN. \end{cases}$ 
6:   Choose action  $j_t = \begin{cases} \operatorname{Uniform}([K]), & \text{if } t \leq KN, \\ \operatorname{argmax}_{i \in [K]} \hat{B}(i), & \text{if } t > KN. \end{cases}$ 
7:   query pair  $(i_t, j_t)$  and receive feedback  $r_t \sim \operatorname{Bernoulli}(p_{i_t, j_t})$ 
8:   if  $t \leq N$  then
9:      $\mathbf{n}_{i_t} = \mathbf{n}_{i_t} + 1$ ,  $\mathbf{w}_{i_t} = \mathbf{w}_{i_t} + r_t$ ,  $\hat{B}(i_t) = \frac{\mathbf{w}_{i_t}}{\mathbf{n}_{i_t}}$ 
10:  end if
11: end for
```

---

739 **G.3 FRANK-WOLFE algorithm used to find approximate solution for G-optimal design**

740 In order to find a solution for the G-optimal design problem, we resort to Frank-Wolfe algorithm  
741 to find an approximate solution. The detailed procedure is listed in Algorithm 5. In Line 4, each  
742 outer product costs  $d^2$  multiplications,  $K^2$  such matrices are scaled and summed into a  $d$ -by- $d$  matrix  
743  $\mathbf{V}(\pi)$ , which costs  $O(K^2 d^2)$  operations in total. In Line 5, one matrix inversion costs approximately  
744  $O(d^3)$ . The weighted norm requires  $O(d^2)$  and the maximum is taken over  $K^2$  such calculated values.  
745 The scaling and update in the following lines only requires  $O(K^2)$ . In summary, the algorithm is  
746 dominated by the calculation in Line 5 which costs  $O(d^2 K^2)$ .

747 In experiments, the G-optimal design  $\pi(i, j)$  is approximated by running 20 iterations of Frank-Wolfe  
748 algorithm, which is more than enough for its convergence given our particular problem instance. (See  
749 Note 21.2 in (Lattimore and Szepesvári, 2020)).

---

**Algorithm 5** G-OPTIMAL DESIGN BY FRANK-WOLFE

---

```
1: Input: number of items  $K$ , contextual vectors  $\phi_{i,j}$ ,  $i \in [K], j \in [K]$ , number of iterations  $R$ 
2: Initialize:  $\pi_1(i, j) = 1/K^2$ 
3: for  $r = 1, 2, \dots, R$  do
4:    $\mathbf{V}(\pi_r) = \sum_{i,j} \pi_r(i, j) \phi_{i,j} \phi_{i,j}^\top$ 
5:    $i_r^*, j_r^* = \operatorname{argmax}_{(i,j) \in [K] \times [K]} \|\phi_{i,j}\| \mathbf{v}(\pi_r)^{-1}$ 
6:    $g_r = \|\phi_{i_r^*, j_r^*}\| \mathbf{v}(\pi_r)^{-1}$ 
7:    $\gamma_r = \frac{g_r - 1/d}{g_r - 1}$ 
8:    $\pi_{r+1}(i, j) = (1 - \gamma_r) \pi_r(i, j) + \gamma_r \mathbb{1}(i_r^* = i) \mathbb{1}(j_r^* = j)$ 
9: end for
10: Output: Approximate G-optimal design solution  $\pi_{R+1}(i, j)$ 
```

---
